1 **Integrative isotopic Paleoecology ( $\delta^{13}\text{C}$ ,  $\delta^{18}\text{O}$ ) of a Late Pleistocene vertebrate**  
2 **community from Sergipe, NE Brazil**

3

4 Mário André Trindade Dantas<sup>1,\*</sup>, Alexander Cherkinsky<sup>2</sup>, Carlos Micael Bonfim  
5 Lessa<sup>1</sup>, Luciano Vilaboim Santos<sup>3</sup>, Mario Alberto Cozzuol<sup>3</sup>, Érica Cavalcante Omena<sup>4,5</sup>,  
6 Jorge Luiz Lopes da Silva<sup>6</sup>, Alcides Nóbrega Sial<sup>5</sup>, Hervé Bocherens<sup>7</sup>

7

8 <sup>1</sup> Laboratório de Ecologia e Geociências, Instituto Multidisciplinar em Saúde,  
9 Universidade Federal da Bahia – Campus Anísio Teixeira, Vitória da Conquista, BA,  
10 Brazil

11 <sup>2</sup> Center for Applied Isotope Studies, University of Georgia, Athens, GA 30602, USA

12 <sup>3</sup> Programa de Pós-graduação em Zoologia, Universidade Federal de Minas Gerais, Belo  
13 Horizonte, MG, Brazil

14 <sup>4</sup> Programa de Pós-graduação em Geociências, Universidade Federal de Pernambuco,  
15 Recife, PE, Brazil

16 <sup>5</sup> Dept. de Geologia, Centro de Tecnologia e Geociências, Universidade Federal de  
17 Pernambuco, Recife, PE, Brazil

18 <sup>6</sup> Dept. de Paleontologia, Museu de História Natural, Universidade Federal de Alagoas,  
19 Maceió, AL, Brazil

20 <sup>7</sup> Biogeology, department of Geosciences and Senckenberg Centre for Human Evolution  
21 and Palaeoenvironment (HEP), Universität Tübingen, Hölderlinstr. 12, 72074 Tübingen,  
22 Germany,

23 \*Corresponding author: Mário A. T. Dantas, e-mail: [matdantas@yahoo.com.br](mailto:matdantas@yahoo.com.br)

24

25 **Abstract**

26 Isotopes are one of the best tools to reconstruct the Paleoecology of extinct taxa,  
27 yielding insights about their diet (through carbon;  $\text{C}_3$  and  $\text{C}_4$  plants), niche breadth ( $B_A$ )  
28 and the environment in which they lived. In the present work we go deeper in the use of  
29 isotopes and explore a mathematical mixing model with the stable isotopes of two  
30 elements (carbon and oxygen) to (1) suggest the relative contribution of four types of  
31 food resources (leaves, fruits, roots and  $\text{C}_4$  grass) for meso- and megaherbivores (weight  
32  $> 100$  kg) that lived in the Late Pleistocene of Poço Redondo, Sergipe, Brasil, and (2)  
33 evaluate which of these herbivores could be the potential prey for the carnivores  
34 *Smilodon populator* and *Caiman latirostris*. To explore the intra/interspecific

35 competition of these fauna, we generate weight estimation, standardized niche breadth  
36 ( $B_A$ ) for the meso-megamammals from Sergipe and compare with data from the meso-  
37 megaherbivores from Africa, concluding that *Eremotherium laurillardii* and *Toxodon*  
38 *platensis* were the best resource competitors in the Late Pleistocene of Sergipe, and  
39 reinforcing their importance as key species in this extinct community. Finally, we  
40 reconstructed the paleoenvironment in which the vertebrate community of Sergipe  
41 lived, estimating Mean Annual Temperature (°C), Mean Annual Precipitation, Biomass  
42 and Energy Expenditure, noting that environments in the Late Pleistocene of Sergipe  
43 were similar to those of Africa nowadays, but hotter and with more energy expenditure  
44 for these meso-megamammals.

45

46 **Keywords.** Quaternary, mammals, isotopes, Paleoecology, communities

47

## 48 **1. Introduction**

49

50 During the last decades, isotopes have been used in Palaeoecology to infer diet of  
51 extinct (and extant) taxa, based primarily in carbon isotopic data (*e.g.* Bocherens *et al.*,  
52 1996; MacFadden, 2005; França *et al.*, 2014a), while nitrogen isotopic data has been  
53 used as well to infer carnivory or omnivory in mammals (*e.g.* Bocherens *et al.*, 2016).  
54 The isotopic approach represented a major advance in paleoecological studies, helping  
55 to infer two main food resources for herbivores ( $C_3$  and  $C_4$  plants) and  
56 paleoenvironmental reconstruction in which herbivores and carnivores could lived  
57 (forested or open environments; Kigston & Harrison, 2007; Nelson, 2013; Dantas *et al.*,  
58 2017).

59 However, isotopes can provide more ecological information than previously  
60 thought, such as estimates of niche width and overlap, helping to better understand the  
61 ecology of extinct taxa, resource competition and key species in extinct communities  
62 (*e.g.* Codron *et al.*, 2007; Dantas *et al.*, 2017), or using two isotope pairs in  
63 mathematical mixing models to suggest more than two food resources for herbivores  
64 (for example seven resources; Phillips, 2012 and references therein).

65 Most researchers use carbon and nitrogen isotopic data, extracting these data from  
66 collagen. However, in tropical regions these proteins are difficult to be preserved,  
67 leaving only the possibility to use carbon and oxygen isotopic data extracted from  
68 hydroxyapatite. This mineral usually survives much better than the organic fractions of

69 collagen (Cherkinsky, 2009), being in tropical regions the best option to recover diet  
70 information from extinct species.

71 The isotopic composition of hydroxyapatite can be preserved with minimal or no  
72 significant diagenetic alteration. Hydroxyapatite carbonate and phosphate in bone and  
73 dentin are more susceptible to diagenetic overprinting than enamel (Bocherens *et al.*,  
74 1996), for example.

75 Substitutions are mainly in the phosphate position and are most likely in the  
76 hydroxyl position. The absorbed carbonates are more labile, but substitute ones are  
77 structural carbonates, and, thus, contribute to saving the original isotopic composition  
78 (Cherkinsky, 2009).

79 Thus, the main aims of this paper were to use mathematical mixing models using  
80 carbon and oxygen isotopic (extracted from hydroxyapatite) data from fossil  
81 vertebrates: (i) to infer four types of resources for herbivores (leaf, fruit, root and C<sub>4</sub>  
82 grass); (ii) to suggest, among the herbivorous mammals from Sergipe, Brazil, which  
83 contributed to the isotopic diet of predators such as *Smilodon populator* and *Caiman*  
84 *latirostris*; (iii) to suggest a trophic web structure for the Sergipe community during the  
85 Late Pleistocene; (iv) to infer whom were the better competitors (key species) for food  
86 resources among herbivores; and, finally, (v) to suggest a paleoenvironmental  
87 reconstruction in which these taxa could have lived through the Late Pleistocene of  
88 Sergipe, estimating Mean Annual Temperature, Mean Annual Precipitation, Biomass  
89 and Energy Expenditure.

90

## 91 **2. Materials and methods**

92

### 93 *2.1. Dataset*

94

95 Sixteen samples (Table S1) of adult individuals of *Eremotherium laurilardi*  
96 (Lund, 1842) (one exception is LPUFS 5693, assigned to a juvenile; Figure S1),  
97 *Catonyx cuvieri* (Lund, 1839), *Pachyarmatherium brasiliense* Porpino, Bergqvist &  
98 Fernicola, 2009, *Holmesina paulacoutoi* (Guerra & Marecha, 1984), *Glyptotherium* sp.,  
99 *Panochthus* sp., *Toxodon platensis* Owen, 1837, *Palaeolama major* (Liais, 1872),  
100 *Equus (Amerhippus) neogeus* Lund, 1840 and *Smilodon populator* Lund 1842 from two  
101 localities in Sergipe (Fazenda Charco and Fazenda São José, Poço Redondo; Figure 1)  
102 were analyzed to obtain carbon and oxygen isotopic composition from the structural

103 carbonate of their bones, dentin and enamel. The samples were collected in “tanks”,  
104 which are natural depressions on Neo-Mesoproterozoic lithotypes, characterized by  
105 numerous fractures as a result of physical and chemical erosion, and contain sediments  
106 transported by seasonal rains, including the remains of animals and plants accumulated  
107 during the dry season. The sediments in these depressions are estimated to be of Late  
108 Pleistocene and Holocene ages.

109

110

### Figure 1.

111

112 The stable isotope analyzes were performed at "Departamento de Geologia" in  
113 "Centro de Tecnologia e Geociências" of Universidade Federal de Pernambuco (Recife,  
114 Pernambuco, Brazil) and in Center for Applied Isotope Studies from University of  
115 Georgia.

116

117 All samples were cleaned by ultrasonic bath with distilled water and then left to  
118 dry naturally. The samples were then crushed into smaller fragments to be treated with  
119 diluted 1N acetic acid to remove surface absorbed and secondary carbonates. Periodic  
120 evacuation ensured that evolved carbon dioxide was removed from the interior of the  
121 sample fragments, and that fresh acid was allowed to reach even the interior micro-  
122 surfaces.

122

123 The chemically cleaned samples were then reacted under vacuum with 100 %  
124 phosphoric acid to dissolve the bone/dentine/enamel mineral and release carbon dioxide  
125 from hydroxyapatite. The resulting carbon dioxide was cryogenically purified from  
126 other reaction products and catalytically converted to graphite (Cherkinsky, 2009).

126

127 Graphite  $^{14}\text{C}/^{13}\text{C}$  ratios were measured using a CAIS 0.5 MeV accelerator mass  
128 spectrometer. The sample ratios were compared to the ratio measured from the Oxalic  
129 Acid I (NBS SRM 4990). The  $^{13}\text{C}/^{12}\text{C}$  ratios were measured separately using a stable  
130 isotope ratio mass spectrometer with respect to PDB.

130

131 All results are reported using delta notation,  $\delta = [(R_{\text{sample}}/R_{\text{standard}} - 1) * 1000]$   
132 (Coplen, 1994). The reference for carbon isotope values ( $R = ^{13}\text{C}/^{12}\text{C}$ ) is V-PDB, and  
133 oxygen isotope values ( $R = ^{18}\text{O}/^{16}\text{O}$ ) is V-SMOW.

133

134 The studied samples were not dated, however we noticed that in Fazenda São  
135 José, Poço Redondo, Sergipe has many  $^{14}\text{C}$  AMS and Electron Spin Resonance - ESR -  
136 datings for *Eremotherium laurillardi* and *Notiomastodon platensis* (Table S1) which  
137 allow us to suggest that this fossil accumulation had relatively low amount of time-

137 averaging (~32 ky, considering both  $^{14}\text{C}$  AMS and Electron Spin Resonance datings  
138 techniques), similarly to another fossil assemblage in northeastern Brazil (~59 ky, based  
139 only in ESR datings; Baixa Grande, Bahia; e.g. Ribeiro *et al.* 2014). In addition, França  
140 *et al.* (2014a) reported that isotopic diet ( $\delta^{13}\text{C}$ ) of *Eremotherium laurillardi* and  
141 *Notiomastodon platensis* did not changed between 12-19 ky, suggesting a stable  
142 environment.

143

## 144 2.2. Additional published data

145

146 In order to complement our results, and refine the determination of the isotopic  
147 diet of Sergipe taxa, we included previously published isotopic data ( $\delta^{13}\text{C}$  and  $\delta^{18}\text{O}$ , of  
148 which most have  $^{14}\text{C}$  AMS datings; Table S1) and  $^{14}\text{C}$  AMS and ESR datings of *E.*  
149 *laurillardi*, *N. platensis*, *T. platensis* and *Caiman latirostris* (Dantas *et al.*, 2011; França  
150 *et al.*, 2014b; Dantas *et al.*, 2017, and references therein).

151 Furthermore, we also compared our results and refined isotopic diet data of  
152 following extant African mesoherbivores (weight between 100 kg and 750 kg) and  
153 megaherbivores (weight > 800 kg) from Kenya and Tanzania (Bocherens *et al.*, 1996;  
154 Kingston & Harrison, 2007; Cerling *et al.*, 2008): *Loxodonta africana* (Blumenbach,  
155 1797), *Equus quagga* Boddaert, 1785 (= *E. burchelli*), *Diceros bicornis*  
156 (Linnaeus, 1758), *Ceratotherium simum* (Burchell, 1817), *Connochaetes taurinus*  
157 (Burchell, 1823), *Syncerus caffer* Sparrman, 1779, *Kobus ellipsiprymnus* (Ogilby,  
158 1833), *Oryx beisa* Rüppell, 1835, *Giraffa camelopardalis* (Linnaeus, 1758) and  
159 *Hippopotamus amphibius* Linnaeus, 1758 (Table S3).

160

## 161 2.3. Multivariate analyses

162

163 Carbon ( $\delta^{13}\text{C}$ ) and oxygen ( $\delta^{18}\text{O}$ ) isotopic data for meso-megaherbivores from  
164 Poço Redondo (Sergipe, Brasil) and Africa was submitted to cluster analyses (Q-mode)  
165 using the weight pair group method with simple arithmetic averages (UPGMA), using  
166 Euclidean Similarity coefficient. A Bootstrap test (N = 10000) was applied to evaluate  
167 the consistency of the clusterings. A Principal Component Analyses (PCA) was made as  
168 well. All analyses were performed in PAST 2.17 (Hammer *et al.*, 2001).

169

## 170 2.4. Weight estimation

171

172 To enhance discussion, we calculated the estimated weight (1) for megafauna  
173 species that lived in Sergipe (Table 1, Table S1) using the following regression  
174 (Anderson *et al.*, 1985):

175

$$(1)w = 0.078C_{(h^{2.73}+f)}$$

176

177 Where  $W$  is the weight (g),  $C$  is the minimum circumference of humerus and  
178 femur diaphysis (in mm). We calculated an average value of circumferences based on  
179 the information available in articles and thesis (Cartelle & Abuhid, 1989; Porpino &  
180 Bergqvist, 2002; Castro & Langer, 2008; Porpino *et al.*, 2009; Molena, 2012; Oliveira  
181 *et al.*, 2017) and in some collections that were accessible (Laboratório de Paleontologia,  
182 Universidade Federal de Sergipe; Museu de Ciências Naturais, Pontifícia Universidade  
183 Católica de Minas Gerais). When the circumference information was not available, we  
184 estimated it using the minimum width of humerus and femur diaphysis as a diameter ( $d$ )  
185 measure (Table S2), through a circumference estimation:  $C = d\pi$ .

186

187 Xenarthrans have flat femur with a high circumference of diaphysis values,  
188 leading to an overestimation of weight if using standard method. To avoid this problem,  
189 we multiplied their femur circumference by 0.4, trying to acquire a more realistic  
190 weight estimation (2). The regression adaptation was calibrated using values for three  
191 extant taxa, one Cingulata (*Priodontes maximus* (Kerr, 1792)) and two Tardigrada  
192 (*Tamandua tetradactyla* (Linnaeus, 1758) and *Myrmecophaga tridactyla* Linnaeus,  
193 1758) (Table S2). Exceptions were made for gliptodonts (*Panochthus* and  
194 *Glyptotherium*) which weight were estimated by original regression proposed by  
195 Anderson *et al.* (1985). For extant African megamammals we used maximum estimate  
196 weights from Coe *et al.* (1976).

196

$$(2)w = 0.078C_{(h^{2.73}+0.4f)}$$

197

## 198 2.5. Ecological measurements

199

200 To estimate ecological measurements, we calculate isotope niche breadth ( $B$ )  
201 using Levins' (1968) measure (3), where  $p_i$  is the relative proportion of individuals in  
202 isotope bin  $i$ . This measure was then standardized ( $B_A$ ) from 0 to 1 following equation

203 (4), where  $n$  is total number of isotope bins available. Values lower or equal to 0.5  
204 suggests a specialist, and above 0.5, a generalist.

205

$$(3) B = \frac{1}{\sum p_i^2} \qquad (4) B_A = \frac{B - 1}{N - 1}$$

206

207 Hence, we also calculated average niche overlaps ( $O$ ) through Pianka's (1973)  
208 index (5), where  $p_i$  is relative proportion of individuals in bin  $i$ . Results between 0 to 0.3  
209 represents low niche overlap; between 0.3 and 0.7, a moderate overlap; and above 0.7,  
210 high overlap.

211

$$(5) O_{jk} = \frac{\sum p_{ij} \cdot p_{ik}}{\sqrt{\sum p_{ij}^2 \cdot \sum p_{ik}^2}}$$

212

213 To improve our discussion about niche overlap of Pleistocene megamammals  
214 from Sergipe, we estimated population density of herbivores ( $D_h$ ) and carnivores ( $D_c$ )  
215 through Damuth (1981; 1993) general equations (6-7), where we included weight ( $w$ ) in  
216 grams:  
217

218

$$(6) \text{Log}_{10}D_h = -0.75\text{Log}_{10}w + 4.23 \qquad (7) \text{Log}_{10}D_c = -0.64\text{Log}_{10}w + 2.23$$

219

220 Then we used this information in a modification of Andrades (2018)  
221 measurements of intraspecific ( $IC$ ; 8) and interspecific competition (species competition  
222 -  $SC$ ; 9) in extinct and extant mammals. Intraspecific competition ( $IC$ ) was calculated  
223 dividing population density ( $D$ ) through its standardized niche breadth ( $B_A$ ).  
224 Interspecific competition ( $SC$ ) were estimated based on the amount of overlap in  
225 isotopic niche between two species in relation to the density of focal species. Values  
226 lower or equal to the median were interpreted as low competition, and above, as high  
227 competition.

228

$$(8) IC = \frac{D}{B_A} \qquad (9) SC = \frac{B_A}{D(B_A - O_{jk})}$$

229

230 To improve the paleoenvironmental reconstruction, we estimated Energy  
231 Expenditure ( $Ee$ ; 10) and Biomass ( $Bio$ ; 11). Through Biomass were estimated



232 secondary production ( $Sp$ ) using ratio of 0.05 to megaherbivores, 0.2 to mesoherbivores  
233 and 0.35 to small herbivores from Africa and Sergipe (Coe *et al.*, 1976):

234

$$(10) 18.2 \cdot w^{0.75} \text{ (Kj/h)}$$

$$(11) \text{Bio} = w \cdot D_h \text{ (Kg/Km}^2\text{)}$$

235

236 With these informations we could propose Annual Precipitation ( $AP$ ) through  
237 regressions (12-14) proposed by Coe *et al.* (1976):

238

$$(12) \text{Log}_{10}\text{Bio} = 1.552\text{Log}_{10}\text{AP} - 0.62$$

$$(13) \text{Log}_{10}\text{Ee} = 1.683\text{Log}_{10}\text{AP} - 0.37$$

$$(14) \text{Log}_{10}\text{Sp} = 1.649\text{Log}_{10}\text{AP} - 1.72$$

239

240 Finally, to estimate the mean and maximum potential prey size for *Smilodon*  
241 *populator*, we used regressions (15-16) proposed for Radloff & Du Toit (2004) for  
242 carnivores from Africa:

243

$$(15) \text{Log}_{10}y_{min} = 1.39\text{Log}_{10}x - 0.74$$

$$(16) \text{Log}_{10}y_{max} = 1.46 \text{Log}_{10}x - 0.17$$

244

## 245 2.6. Isotopic diet interpretation using $\delta^{13}\text{C}$ and $\delta^{18}\text{O}$ values

246

247 The interpretation of carbon isotopic values for medium-to large-bodied  
248 herbivorous mammals are generally made based on known average for  $\text{C}_3$  plants ( $\mu\delta^{13}\text{C}$   
249 =  $-27 \pm 3$  ‰),  $\text{C}_4$  plants ( $\mu\delta^{13}\text{C}$  =  $-13 \pm 2$  ‰) and CAM plants (intermediate values  
250 between  $\delta^{13}\text{C}$  of  $\text{C}_3$  and  $\text{C}_4$  plants).

251 Tejada-Lara *et al.* (2018) suggested that body mass influences physiological  
252 carbon enrichment ( $\square^*_{\text{diet-bioapatite}}$ ) in mammals, and provided equations to determine  
253 these values of enrichment. Carbon isotopic data presented here are from mammals  
254 (extinct and extant) with body mass varying from 38 to 6,300 kg (Table 1),  $\square^*_{\text{diet-bioapatite}}$   
255 varied between 12.47 to 14.84 ‰, we used four values: +12 ‰ for taxa weighting less  
256 than 75 kg; +13 ‰ for taxa weighting between 75 kg to 600 kg; +14 ‰ for taxa  
257 weighting between 600 kg to 3,500 kg; and, finally, +15 ‰ for taxa weighting more  
258 than 3,500 kg (Table S3).

259 Considering an enrichment of 12-15 ‰,  $\delta^{13}\text{C}$  values lower than -15 ‰ to -12 ‰  
260 are typical of animals with a diet consisting exclusively of  $\text{C}_3$  plants, while  $\delta^{13}\text{C}$  values  
261 higher than -1 ‰ to +2 ‰ are consistent with a diet based on  $\text{C}_4$  plants.



262 However, C<sub>3</sub> plants show different values of enrichment. For example, leaves in  
263 C<sub>3</sub> plants are depleted in <sup>13</sup>C about -1.0 ‰ than others non-photosynthetic tissues like  
264 fruits (in average 1.5 ‰) and roots (in average 1.1 ‰), in contrast, C<sub>4</sub> plants tend to  
265 show no enrichment of <sup>13</sup>C in tissues (*e.g.* fruits, roots) compared to leaves (*e.g.*  
266 Yoneyama & Ohtani, 1983; MacFadden, 2005; Cernuzak *et al.*, 2009). Thus we can  
267 estimate different type of food resources using carbon isotopic values in association  
268 with other isotope in a mathematical mixing model.

269 In general, nitrogen is used to estimate food resources in a mathematical mixing  
270 model with two isotopes (*e.g.* Phillips, 2012, and examples therein), however, analyses  
271 in hydroxyapatite are unable to generate nitrogen isotopic data, thus, the only option  
272 available is to use oxygen isotopic data instead.

273 <sup>18</sup>O values could be used to help in reconstruction of abiotic conditions,  
274 suggesting dry environment (higher <sup>18</sup>O values) or wet environment (lower <sup>18</sup>O values;  
275 *e.g.* Bocherens & Drucker, 2013), as well, helping to indicate in which guild a  
276 vertebrate belongs, because based in its diet, grazers have higher <sup>18</sup>O values than  
277 browsers (*e.g.* Bocherens *et al.*, 1996; Kingston & Harrison, 2007; Cerling *et al.*, 2008).

278 In literature there are no <sup>18</sup>O values established for each type of tissue in C<sub>3</sub>  
279 plants (*e.g.* leaves, fruits, roots), only that leaves are more enriched in <sup>18</sup>O than other  
280 non-photosynthetic tissues due to photosynthesis (*e.g.* Cernuzak *et al.*, 2009). A clue to  
281 know expected values of <sup>18</sup>O in meso-megamammals can be observed in taxa from  
282 Africa, in which values between 30-33 ‰ are found in C<sub>4</sub> grazers, while values near 37  
283 ‰ are found in leaf browsers, as *Giraffa* (Bocherens *et al.*, 1996; Kingston & Harrison,  
284 2007; Cerling *et al.*, 2008). An enrichment of <sup>18</sup>O in other C<sub>3</sub> plants tissues can be  
285 deduced from results found for forest vertebrates by, for example, Nelson (2013), which  
286 shows that fruits (~2 ‰) and roots (~4 ‰) are more enriched than leaves.

287 Thus, in this paper, we suggest a refinement of proportion that medium- to large-  
288 bodied herbivorous mammals (extant; in extinct summing +2 ‰ to compare to modern  
289 animals due to Suess effect - Keeling, 1979 - in carbon data) could intake using <sup>13</sup>C  
290 and <sup>18</sup>O values in a two isotopes mathematical mixing model (Phillips, 2012),  
291 suggesting as food types: leaves, fruits, roots and C<sub>4</sub> grass.

292 Trying to distinguish food resources, we suggest carbon and oxygen isotopic  
293 values (Table 2) to be applied in equations (17) in Excel (Microsoft Corporation,  
294 Redmond, Washington) through Solver supplement (presuming non-negative values):

295

$$(17) \quad \begin{aligned} \delta^{13}\text{C}_{\text{mix}} &= \delta^{13}\text{C}_1f_1 + \delta^{13}\text{C}_2f_2 + \delta^{13}\text{C}_3f_3 + \delta^{13}\text{C}_4f_4 \\ \delta^{18}\text{O}_{\text{mix}} &= \delta^{18}\text{O}_1f_1 + \delta^{18}\text{O}_2f_2 + \delta^{18}\text{O}_3f_3 + \delta^{18}\text{O}_4f_4 \\ 1 &= f_1 + f_2 + f_3 + f_4 \end{aligned}$$

296

297 For Africa and Sergipe, we used the same isotopic values for carbon (Table 2),  
298 however, for oxygen, we used values of Africa as proxy, as this is where the last  
299 terrestrial megamammals live there, and apparently in an environment similar to where  
300 Pleistocene mammals from South America lived (*e.g.* Cartelle, 1999).

301 To compare the  $\delta^{18}\text{O}_{\text{CO}_3}$  from Africa with those from Sergipe we considered  
302  $\delta^{18}\text{O}_{\text{CO}_3}$  values of proboscideans as a "thermometer", since these animals are considered  
303 evaporation-insensitive taxa (*e.g.* Yann *et al.*, 2014) and water in plant tissues carries  
304 the same  $^{18}\text{O}$  isotopic signal than source water of environment (Marshall *et al.*, 2007).

305 Thus, we used the mean values of  $\delta^{18}\text{O}_{\text{CO}_3}$  found in *Loxodonta africana*  
306 (Proboscidea;  $\mu\delta^{18}\text{O}_{\text{CO}_3} = 30.03 \pm 1.05 \text{ ‰}$ ; Figure 2A) in comparison with  $\delta^{18}\text{O}_{\text{CO}_3}$  values  
307 of *Notiomastodon platensis* (Proboscidea;  $\mu\delta^{18}\text{O}_{\text{CO}_3} = 32.57 \pm 1.95 \text{ ‰}$ ; Figure 2B) as  
308 proxy to establish the enrichment (+2.5 ‰) of  $^{18}\text{O}$  Sergipe environment, and thus,  
309 correct  $\delta^{18}\text{O}_{\text{CO}_3}$  values in different tissues of  $\text{C}_3$  plants (leaves, fruits, roots) and  $\text{C}_4$   
310 grass.

311

312

### Figure 2.

313

314 Using  $\delta^{18}\text{O}_{\text{CO}_3}$  of *L. africana* and *N. platensis* we estimate, as well, the Mean  
315 Annual Temperature - MAT ( $^{\circ}\text{C}$ ) in Africa and in the Late Pleistocene of Poço  
316 Redondo, Sergipe, Brazil. To do that we considered that  $\delta^{18}\text{O}_{\text{CO}_3}$  is enriched in  $\sim 8.7 \text{ ‰}$   
317 than  $\delta^{18}\text{O}_{\text{PO}_4}$  (Bryant *et al.*, 1996), then using  $\delta^{18}\text{O}_{\text{PO}_4}$  we estimate  $\delta^{18}\text{O}_{\text{water}}$  (meteoric  
318 water) through regression (18) presented by Ayliffe *et al.* (1992), and, finally, estimated  
319 MAT through regression (19) presented by Rozanski *et al.* (1993).

320

$$(18) \quad \delta^{18}\text{O}_{\text{PO}_4} = 0.94\delta^{18}\text{O}_{\text{water}} + 23.3$$

$$(19) \quad \delta^{18}\text{O}_{\text{water}} = 0.36\text{MAT} - 12.68$$

321

322 For carnivores (*Smilodon populator* and *Caiman latirostris*) we used the same  
323 equations used to estimate food resources for herbivores (11), however including as  
324 potential preys the taxa present in Poço Redondo, Sergipe (Tables 3-4), summing +2 ‰

325 due to Suess effect (Keeling, 1979) and -1 ‰ due to trophic level (Bocherens &  
326 Drucker, 2013) in carbon data.

327

### 328 **3. Results and discussion**

329

#### 330 *3.1. Weight estimation*

331

332 For the Brazilian Intertropical Region (including Sergipe), there are no weight  
333 estimations for Pleistocene mammals, thus, following the first attempt proposed by  
334 Dantas *et al.* (2017), we continue our effort to know the weight of mammals that lived  
335 there, which could help us to better reconstruct the ecology of this fauna.

336 For localities in Sergipe, we were able to suggest weight measures (Table S2)  
337 only for *Eremotherium laurillardi* ( $w = \sim 3,416$  kg) and *Toxodon platensis* ( $w = \sim 1,770$   
338 kg), for further taxa there are no fossils available to estimate their weight. Thus, we  
339 estimated weights on the basis of fossils from other geographical regions through  
340 Brazilian Intertropical Region (Table S2). Therefore, we estimated and used the  
341 following weights: *Catonyx cuvieri* ( $w = \sim 777$  kg), *Pachyarmatherium brasiliense* ( $w =$   
342  $\sim 38$  kg), *Panochthus* sp. ( $w = \sim 785$  kg), *Glyptotherium* sp. ( $w = \sim 710$  kg), *Holmesina*  
343 *paulacoutoi* ( $w = \sim 120$  kg), *Notiomastodon platensis* ( $w = \sim 6,265$  kg), *Palaeolama*  
344 *major* ( $w = \sim 285$  kg), *Equus (Amerhippus) neogeus* ( $w = \sim 420$  kg) and *Smilodon*  
345 *populator* ( $w = \sim 315$  kg).

346 In comparison with weight estimated for Pleistocene mammals from Argentina,  
347 we note that *E. laurillardi* ( $w = 3,416$  kg) is a little smaller than the minimum weight  
348 attributed for *Megatherium americanum* ( $w = 3,800-6,070$  kg; Table 1). However, this  
349 could be related to local environmental conditions (dry environment, see  
350 Paleoenvironmental Reconstruction), and not to a flaw in our regression correction.  
351 Indeed, we estimated for an *E. laurillardi* in Rio Branco, Acre, using the same  
352 approach, a weight of almost 6,600 kg, therefore similar than the maximum weight  
353 attributed for *M. americanum*.

354 The weight of *Catonyx cuvieri* was estimated in 777 kg, which is similar than the  
355 weight suggested by Fariña *et al.* (1998) for *Scelidotherium leptcephalum* (median,  $w$   
356 = 633 kg; Table 1), another South American Scelidotheriinae, which give us confidence  
357 in our correction of the regression proposed by Anderson *et al.* (1985).

358 For Cingulata, we estimated for *Pachyarmatherium brasiliense* a weight of 38 kg.  
359 Unfortunately, we did not find any comparable estimation for this taxa. However, it is  
360 similar to the weight of the extant armadillo *Priodontes maximus* ( $w = \sim 19\text{-}33$  kg), and  
361 much smaller than *Holmesina paulacoutoi* ( $w = 120$  kg).

362 The weight of *Glyptotherium* sp. ( $w = 710$  kg) was more similar to that suggested  
363 for *Glyptodon reticulatus* ( $w = 862$  kg) than to *Glyptodon clavipes* ( $w = 2,000$  kg; Table  
364 1). Nowadays, specimens of *Glyptotherium* from South America are attributed only to  
365 this genus (e.g. Oliveira et al., 2010), thus, we estimated the weight for *Glyptotherium*  
366 *texanum* ( $w = 438$  kg) and *Glyptotherium arizonae* ( $w = 1,165$  kg), based on measures  
367 presented by Gillette & Ray (1981), and noticed that *Glyptotherium* from BIR is  
368 between proposed weight of this genus.

369 For *Panochthus* sp., we suggest a weight of 785 kg, which is lower than suggested  
370 for Argentinian *Panochthus* spp. ( $w = 1,060\text{-}1,110$  kg; Table 1); as for *E. laurillardi*,  
371 this could be related to local environmental conditions in BIR.

372 For *Toxodon platensis* ( $w = 1,770$  kg), *Notiomastodon platensis* ( $w = 6,265$  kg)  
373 and *Smilodon populator* ( $w = 315$  kg), we suggest similar weights for taxa from  
374 Argentina (Table 1); only *Palaeolama major* ( $w = 285$  kg) and *Equus (Amerhippus)*  
375 *neogeus* ( $w = 420$  kg) do not have estimations for comparison.

376 Thus, in Sergipe, we had a fauna composed by one megacarnivore (*S. populator*),  
377 one omnivore (*P. brasiliense*), six mesoherbivores (*H. paulacoutoi*, *C. cuvieri*,  
378 *Glyptotherium* sp., *Panochthus* sp., *P. major* and *E. (A.) neogeus*) and three  
379 megaherbivores (*E. laurillardi*, *T. platensis* and *N. platensis*).

380

### 381 3.2. Isotopic paleoecology ( $\delta^{13}\text{C}$ , $\delta^{18}\text{O}$ ) of meso-megaherbivores mammals

382

383 Attempting to understand better isotopic paleoecology of Sergipe Pleistocene  
384 mammals taxa, we reunite here, to compare, available isotopic data for 11 extant  
385 mammals from Africa (Table 3 and Figure 3A), to analyze the isotopic diet patterns  
386 found through mathematical mixing model using carbon and oxygen. Based in Principal  
387 Component Analyses (PCA) we notice that contribution of carbon ( $p_i = 68$  %) is higher  
388 than oxygen ( $p_i = 32$  %) in this mathematical mixing model diet refinement, and  
389 together with Cluster analyses shows three well defined groups/guilds: browser, mixed-  
390 feeders and grazers (Figure 3A-B).

391

392

### Figure 3.

393

394 In Africa savannahs there were, at least, 20 species of grazers, 13 of browsers, 10  
395 of mixed-feeders and one of omnivore (Owen-Smith, 1982). Grazer guilds were  
396 composed by the megaherbivore *Ceratotherium simum* ( $\mu\delta^{13}\text{C} = 0.30 \pm 0.26 \text{ ‰}$ ,  $\mu\delta^{18}\text{O} =$   
397  $35.27 \text{ ‰}$ ), a specialist grazer ( $B_A = 0.03$ ) feeding on 96 % of  $\text{C}_4$  grass and 4 % of leaves,  
398 and for specialists mesoherbivores *Equus quagga* ( $\mu\delta^{13}\text{C} = -0.67 \pm 0.13 \text{ ‰}$ ,  $\mu\delta^{18}\text{O} =$   
399  $31.28 \pm 1.83 \text{ ‰}$ ;  $B_A = 0.06$ ), *Connochaetes taurinus* ( $\mu\delta^{13}\text{C} = -0.15 \pm 1.37 \text{ ‰}$ ,  $\mu\delta^{18}\text{O} =$   
400  $33.36 \pm 0.90 \text{ ‰}$ ;  $B_A = 0.03$ ), *Syncerus caffer* ( $\mu\delta^{13}\text{C} = 0.92 \pm 1.38 \text{ ‰}$ ,  $\mu\delta^{18}\text{O} = 30.63 \pm 1.45$   
401  $\text{ ‰}$ ;  $B_A = 0.06$ ), *Kobus ellipsiprymnus* ( $\mu\delta^{13}\text{C} = 1.00 \pm 1.03 \text{ ‰}$ ,  $\mu\delta^{18}\text{O} = 33.40 \pm 0.90 \text{ ‰}$ ;  
402  $B_A = 0.00$ ) and *Oryx beisa* ( $\mu\delta^{13}\text{C} = -0.70 \pm 1.01 \text{ ‰}$ ,  $\mu\delta^{18}\text{O} = 33.40 \pm 1.70 \text{ ‰}$ ;  $B_A = 0.03$ ),  
403 which have a diet composed mainly by  $\text{C}_4$  grass (varying from 92 % to 100 %; Table 3;  
404 Figure 3A-B), consumption of roots and leaves were low ( $p_i = 0\text{-}6\%$  and  $1\text{-}4 \%$ ,  
405 respectively), and fruits ( $p_i = 0\text{-}1 \%$ ) virtually inexistent.

406 In browser guild we have data only for the specialist *Giraffa camelopardalis*  
407 ( $\mu\delta^{13}\text{C} = -11.32 \pm 1.93 \text{ ‰}$ ,  $\mu\delta^{18}\text{O} = 37.01 \pm 1.57 \text{ ‰}$ ;  $B_A = 0.18$ ) feeding in more than 77%  
408 of leaves (Table 3; Figure 3A-B), and, in mixed-feeder guild are *Loxodonta africana*  
409 ( $\mu\delta^{13}\text{C} = -8.60 \pm 2.01 \text{ ‰}$ ,  $\mu\delta^{18}\text{O} = 30.03 \pm 1.05 \text{ ‰}$ ;  $B_A = 0.84$ ) and *Diceros bicornis*  
410 ( $\mu\delta^{13}\text{C} = -10.12 \pm 1.80 \text{ ‰}$ ,  $\mu\delta^{18}\text{O} = 29.54 \pm 1.34 \text{ ‰}$ ;  $B_A = 0.77$ ) which fed similarly in  $\text{C}_4$   
411 grass ( $p_i = 21\text{-}24\%$ ), roots ( $p_i = 24\%$ ), fruits ( $p_i = 26\text{-}34\%$ ) and leaves ( $p_i = 21\text{-}25\%$ ;  
412 Table 3; Figure 3A-B). *Hippopotamus amphibius* ( $\mu\delta^{13}\text{C} = -4.16 \pm 1.50 \text{ ‰}$ ,  $\mu\delta^{18}\text{O} =$   
413  $26.90 \pm 1.59 \text{ ‰}$ ;  $B_A = 0.35$ ) fed more in  $\text{C}_4$  grass ( $p_i = 58\%$ ), in its case, values attributed  
414 to roots ( $p_i = 37\%$ ) could be  $\text{C}_3$  aquatic plants, due to lower isotopic values of carbon  
415 and oxygen (Table 3).

416 For Sergipe, we generated new isotopic data for *Eremotherium laurillardi* and  
417 *Toxodon platensis*, plus unpublished isotopic data for *Catonyx cuvieri*, *Holmesina*  
418 *paulacoutoi*, *Glyptotherium* sp., *Panochthus* sp., *Palaeolama major* and *Equus*  
419 (*Amerhipus*) *neogeus*, and include published isotopic data for *Eremotherium laurillardi*,  
420 *Toxodon platensis*, *Notiomastodon platensis* (França et al., 2014a; Dantas et al., 2017,  
421 and references therein; Table 3 and S1; Figure 3A and 4A-B) to refine isotopic diet of  
422 all taxa that lived in Sergipe during the Late Pleistocene.

423

424

### Figure 4.

425

426 Based in PCA and Cluster Analyses (Figure 3A-B) we notice that only *N.*  
427 *platensis* ( $\mu\delta^{13}\text{C} = -0.18 \pm 1.10 \text{ ‰}$ ,  $\mu\delta^{18}\text{O} = 32.57 \pm 1.95 \text{ ‰}$ ;  $B_A = 0.07$ ;  $p_i\text{C}_4 = 90 \text{ ‰}$ ) was  
428 included in grazer guild, feeding in more than 90% of C<sub>4</sub> grass, as observed in  
429 herbivores mammals from Africa. Remaining studied taxa was included in mixed-feeder  
430 guild (Figure 3A-B), being subdivided in four subgroups, which presents mainly  
431 variations in consumption of C<sub>4</sub> plants.

432 *T. platensis* ( $\delta^{13}\text{C} = -4.88 \text{ ‰}$ ,  $\delta^{18}\text{O} = 32.16 \text{ ‰}$ ;  $B_A = 0.24$ ), *E. (A.) neogeus* ( $\delta^{13}\text{C} =$   
433  $-3.02 \text{ ‰}$ ,  $\delta^{18}\text{O} = 31.39 \text{ ‰}$ ;  $B_A = 0.06$ ) and *Catonyx cuvieri* ( $\delta^{13}\text{C} = -3.46 \text{ ‰}$ ,  $\delta^{18}\text{O} =$   
434  $30.27 \text{ ‰}$ ;  $B_A = 0.16$ ) presents major consumption of C<sub>4</sub> grass ( $p_i = 72\text{-}92 \text{ ‰}$ ), but fed  
435 well in roots ( $p_i = 8\text{-}20 \text{ ‰}$ ). In this subgroup only *T. platensis* presented consumption of  
436 leaves ( $p_i = 2 \text{ ‰}$ ) and fruits ( $p_i = 6 \text{ ‰}$ ). The diet of *C. cuvieri* was in contrast to a  
437 browser diet expected for a Scelidotherinae (Bargo *et al.*, 2006a, b; Dantas *et al.*, 2017).  
438 The analyzed sample (UGAMS 35324; Table S1) belonged to an adult individual  
439 (Dantas & Zucon, 2007), thus, we hypothesize that the environmental conditions led to  
440 a change of its diet with a major consumption of C<sub>4</sub> grass and roots.

441 In other subgroup we have *Palaeolama major* ( $\mu\delta^{13}\text{C} = -7.34 \text{ ‰}$ ,  $\mu\delta^{18}\text{O} = 31.94$   
442  $\text{ ‰}$ ;  $B_A = 0.44$ ), *Panochthus* sp. ( $\delta^{13}\text{C} = -5.91 \text{ ‰}$ ,  $\delta^{18}\text{O} = 29.79 \text{ ‰}$ ;  $B_A = 0.31$ ) and  
443 *Holmesina paulacoutoi* ( $\delta^{13}\text{C} = 6.05 \text{ ‰}$ ,  $\delta^{18}\text{O} = 30.36 \text{ ‰}$ ;  $B_A = 0.27$ ), these taxa had a  
444 moderate consumption of C<sub>4</sub> grass ( $p_i = 59\text{-}66 \text{ ‰}$ ) and roots ( $p_i = 23\text{-}41 \text{ ‰}$ ). In this  
445 subgroup only *P. major* presented consumption of fruits ( $p_i = 18 \text{ ‰}$ ). Marcolino *et al.*  
446 (2013), through the analysis of coprolites, suggested a diet based on C<sub>3</sub> plants for this  
447 taxon, which is consistent with our results – consumption of 41 % of C<sub>3</sub> plants tissues  
448 (fruits and roots).

449 Finally, *Eremotherium laurillardi* ( $\mu\delta^{13}\text{C} = -5.11 \pm 1.95 \text{ ‰}$ ,  $\mu\delta^{18}\text{O} = 28.42 \pm 1.64$   
450  $\text{ ‰}$ ;  $B_A = 0.23$ ) and *Glyptotherium* sp. ( $\delta^{13}\text{C} = -1.89 \text{ ‰}$ ,  $\delta^{18}\text{O} = 26.47 \text{ ‰}$ ;  $B_A = 0.04$ ) was  
451 grouped with *H. amphibius*, mainly because of their lower oxygen isotopic values . For  
452 *E. laurillardi* the lower isotopic values of oxygen was attributed to it consumption on  
453 roots ( $p_i = 33 \text{ ‰}$ ), while in *H. amphibius* it could be related to its feeding on aquatic C<sub>3</sub>  
454 plants. It is worth noting that LPUFS 5693 was an unworn molariform from a juvenile  
455 (perhaps from a suckling individual; Figure S1A-B), and we noticed that the carbon  
456 isotopic data ( $\delta^{13}\text{C} = -6.05 \text{ ‰}$ ) was not different from the adults of the same locality,  
457 being equivalent to mother diet, because carbon isotopic values of mother milk and  
458 offspring would not have significant differences (*e.g.* trophic level; Jenkins *et al.*, 2001).



459 Bargo *et al.* (2006a) suggested that *M. americanum* and *E. laurillardii* had  
460 masticatory apparatus with similar biomechanical functions, presenting robust cranial  
461 muscles which allow them to have a strong bite, and a thick cone-shaped and prehensile  
462 upper lip that could select parts of plants. Following Vizcaino *et al.* (2006) and Bargo *et*  
463 *al.* (2006b) we estimated the occlusal surface area (OSA) and Hypsodonty index (HI)  
464 for a dentary of *E. laurillardii* (LPUFS 4755; Figure S1C-D) from Sergipe, to support  
465 the discussion of our isotopic results. Estimate OSA from LPUFS 4755 was 10,650.83  
466 mm<sup>2</sup>, which is equivalent for OSA found for *Megatherium americanum*  
467 (10,818.36±464.23 mm<sup>2</sup>; Vizcaino *et al.*, 2006), which allow us to suggest that it could  
468 process a large amount of turgid to soft food items, as C<sub>4</sub> grass and C<sub>3</sub> roots. HI of *E.*  
469 *laurillardii* LPUFS 4755 was higher (HI = 0.96; length of the tooth row = 172.94 mm;  
470 depth of the dentary = 166.06 mm) than those found for northeastern Brazilian species  
471 (MCL and MNRJ samples; HI = 0.76±0.02; Bargo *et al.*, 2006b), and closer to HI found  
472 for *M. americanum* (HI = 1.02±0.07; Bargo *et al.*, 2006b), which is odd, but may  
473 suggest in Sergipe a population adapted to a diet with high consumption of dust and grid  
474 together with their food items (as C<sub>4</sub> grass and C<sub>3</sub> roots), which reinforce our  
475 interpretation found while using the mathematical mixing model of carbon and oxygen  
476 isotopic values.

477 For *Glyptotherium* sp. we have only one sample, its lower value of oxygen is odd,  
478 as it had a great consumption of C<sub>4</sub> grass ( $p_i = 94\%$ ). Gillette & Ray (1981) suggests  
479 that *Glyptotherium* could have a semi-aquatic habit, as *H. amphibius*, however, as we  
480 have only one sample, we cannot discard or confirm this hypothesis.

481

### 482 3.3. Isotopic paleoecology ( $\delta^{13}\text{C}$ , $\delta^{18}\text{O}$ ) of Sergipe carnivorous vertebrates

483

484 In addition to the isotopic data of meso-megaherbivores from Poço Redondo,  
485 Sergipe, we generated isotopic data of carbon and oxygen for *Pachyarmatherium*  
486 *brasiliense* and *Smilodon populator*, and included published isotopic data for *Caiman*  
487 *latirostris* (França *et al.*, 2014b), to suggest a trophic web in this assemblage (Figure 5).

488 Downing and White (1995) suggests for *Pachyarmatherium leiseyi* a diet  
489 composed mainly of termites and ants. Unfortunately, as we do not have nitrogen  
490 isotopic data for *P. brasiliense*, we could not test this hypothesis. However, following  
491 Downing and White (1995), our results in mathematical mixing model ( $\delta^{13}\text{C} = -6.66\text{‰}$ ,  
492  $\mu\delta^{18}\text{O} = 28.70\text{‰}$ ;  $B_A = 0.25$ ) could not reflect a diet on plants, but on insects that



493 collected tissues of these plants, thus, *P. brasiliense* probably fed more on Blattodea  
494 (termites and ants) taxa which lived in open areas (69 %; feeding on C<sub>4</sub> grass).

495 *Smilodon populator* ( $\delta^{13}\text{C} = -6.06 \text{ ‰}$ ,  $\delta^{18}\text{O} = 30.58 \text{ ‰}$ ) was a generalist carnivore  
496 ( $B_A = 0.53$ ) and had as main preys ( $p_i \geq 10 \text{ ‰}$ ; Table 4), *P. major* (14 %), *H. paulacoutoi*  
497 (12 %), *Toxodon platensis* (12 %), *P. brasiliense* (11 %), *Panochthus* sp. (12 %),  
498 *Catonyx cuvieri* (10 %), *Equus (Amerhippus) neogeus* (10 %) and *Caiman latirostris*  
499 (10 %; Table 4; Figures 4A-5), allowing us to hypothesize that, at least in Sergipe, it did  
500 not have a specialization on a prey type, which could suggest a pack-hunting behavior,  
501 as individuals of this pack could feed on a variety of preys sampled proportionally.

502 Using regressions proposed by Radloff & Du Toit (2004) we estimate that the  
503 mean and maximum prey size for *S. populator* could have varied between 540-3,000 kg,  
504 which allows us to suggest that only 36 % of its diet was composed of taxa belonging to  
505 his optimal interval (Table 4). Above this limit there is a low percentage ( $p_i = 7 \text{ ‰}$ ),  
506 including the megaherbivores *Eremotherium laurillardi* and *Notiomastodon platensis*,  
507 however, the majority of its diet ( $p_i = 56 \text{ ‰}$ ) was possibly based on mammals weighting  
508 less than 540 kg (Table 4). It is possible that *S. populator* hunted actively *Equus (A.)*  
509 *neogeus* ( $p_i = 10 \text{ ‰}$ ) and *Palaeolama major* ( $p_i = 14 \text{ ‰}$ ), as their weight is not so  
510 distant from their mean prey size. The predation on *C. latirostris* is suggested ( $p_i = 10$   
511  $\text{ ‰}$ ) based mainly in observation of predation nowadays of the extant Felidae, *Panthera*  
512 *onca* in this taxa (e.g. Azevedo & Verdade, 2011). Isotopic contribution of *P.*  
513 *brasiliense* ( $p_i = 11 \text{ ‰}$ ) and *H. paulacoutoi* ( $p_i = 12 \text{ ‰}$ ) for *S. populator* diet could  
514 represent a scavenger habits for this carnivore (Table 4).

515 In southern Chile, Prevosti & Martin (2013), based on carbon and nitrogen  
516 isotopes, suggested as possible prey for *Smilodon: Hippidion*, indetermined Camelidae  
517 and *Lama guanicoe* (Camelidae), which is similar to our results, as major prey was  
518 Camelidae taxa. However, this approach depends on herbivores isotopic data available,  
519 and Bocherens *et al.* (2016) suggests as main prey for *Smilodon*, *Macrauchenia*  
520 (Macraucheniidae), followed by *Megatherium* (Megatheriidae) and *Lestodon*  
521 (Mylodontidae), which is very different for our results, mainly because we do not have  
522 isotopic data for Macraucheniidae and Mylodontinae taxa in Sergipe.

523 These results could show us a regional difference in prey types for *S. populator*,  
524 or, as said previously, be a consequence of the absence of isotopic data for more  
525 herbivores in our analyses.

526 Another carnivore found in Sergipe was *Caiman latirostris* ( $\delta^{13}\text{C} = -3.01\text{‰}$ ,  $\delta^{18}\text{O}$   
527  $= 31.40\text{‰}$ ; França *et al.*, 2014b), which was more specialist ( $B_A = 0.27$ ) than *S.*  
528 *populator*, but our analyses allow us to suggest that it could feed on a variety of taxa,  
529 mainly on *N. platensis* (44 %), as well, in *E. (A.) neogeus* (18 %), *T. platensis* (16 %),  
530 *C. cuvieri* (12 %) and *Glyptotherium* sp. (10 %; Table 4).

531 We know that *C. latirostris* could not actively hunt mammals taxa found in  
532 Sergipe, as they weight more than 420 kg (Table 4), however, we suggest that it could  
533 fed on dead corpses, acting as a scavenger like other crocodiles, because this would  
534 facilitate dismembering of large prey corpses (*e.g.* Dixon, 1989; Perez-Higareda *et al.*,  
535 1989; Figures 4A-5).

536

537

### Figure 5.

538

#### 539 3.4. Niche overlap and resources competition in meso-megaherbivores mammals

540

541 Africa ecosystems were structured by meso-megaherbivores composed mainly by  
542 grazers taxa, belonging to the orders Proboscidea, Cetartiodactyla and Perissodactyla  
543 (*e.g.* Cumming, 1982). In our analysis, the grazer guild was composed of one  
544 megaherbivore (*C. simum*) and five mesograzers (*E. quagga*, *C. taurinus*, *S. caffer*, *K.*  
545 *ellipsiprymnus* and *O. beisa*), all feeding in more than 90% of C<sub>4</sub> grass, having a high  
546 niche overlap ( $O = 1.00$ ; Table 3). Despite these high values, competition indexes  
547 (Table 5) allow us to suggest that intraspecific competition ( $IC$ ; Table 5) was higher  
548 than interspecific competition with other grazers ( $SC$ ; Table 5), which was virtual  
549 inexistent (Figure 6), probably because they fed on different taxa of C<sub>4</sub> grass (*e.g.*  
550 Arsenault & Owen-Smith, 2011) or acted as resource facilitator for some taxa (*e.g.*  
551 Perrin & Brereton-Stiles, 1999), partitioning food resources through body size (*e.g.*  
552 Kleynhans *et al.*, 2011).

553 Niche overlap between grazers and mixed-feeders (*L. africana* and *D. bicornis*)  
554 was moderate ( $O = 0.49-0.53$ ), mainly because these taxa fed more in fruits ( $p_i = 0.26-$   
555  $0.34$ ). However, although they fed little on C<sub>4</sub> grass ( $p_i = 0.21-0.24$ ), if these species try  
556 to compete for grasses, they were much more competitive than grazers (Table 5; Figure  
557 6; *e.g.* Boer *et al.*, 2015). *Hippopotamus amphibius* had a great consumption of C<sub>4</sub> grass  
558 ( $p_i = 0.58$ ), and presents a moderate niche overlap with *C. simum* and *C. taurinus* ( $O =$

559 0.54) and a high niche overlap with remain grazers ( $O = 0.84-0.87$ ), being a little better  
560 competitor for this kind of resource (Table 5; Figure 6).

561 *Giraffa camelopardalis* was the only browser evaluated, presenting a moderate  
562 niche overlap with *L. africana* and *D. bicornis* ( $O = 0.40$  and  $0.63$ , respectively), being  
563 a weak competitor with these taxa (Table 5), and had a low niche overlap with grazers  
564 ( $O = 0.01-0.33$ ).

565 The best competitor species in Africa mammal fauna through interspecific  
566 competition index (Table 5; Figure 6) was *Loxodonta africana*, followed by *D. bicornis*,  
567 as it was already observed in experimentation (Landman *et al.*, 2013).

568

### 569 **Figure 6**

570

571 Based in these observations on Africa meso-megaherbivores fauna, we can make  
572 some assumptions for Pleistocene meso-megaherbivores fauna from Poço Redondo,  
573 Sergipe State. First of all, we note that niche overlap was high for all taxa ( $O = 0.80-$   
574  $1.00$ ), mainly because mixed feeders taxa had a great consumption of  $C_4$  grass ( $p_i =$   
575  $0.59-0.80$ ).

576 *N. platensis* ( $w = 6,265$  kg) was the unique grazer, and as in grazers from Africa,  
577 the intraspecific competition was higher, and apparently more important, than  
578 interspecific competition (Table 5; Figure 7).

579 The mixed-feeder guild was composed of eight taxa, two megaherbivores (*E.*  
580 *laurillardi*,  $w = 3,416$  kg; *T. platensis*,  $w = 1,770$  kg) and six mesoherbivores (*H.*  
581 *paulacoutoi*,  $w = 120$  kg; *P. major*,  $w = 285$  kg; *C. cuvieri*,  $w = 777$  kg; *E. (A.) neogeus*,  
582  $w = 420$  kg; *Glyptotherium* sp.,  $w = 710$  kg; *Panochthus* sp.,  $w = 785$  kg).

583 As in Africa all mixed-feeders were better competitors than grazers, presenting  
584 better *IC* (Table 5). The better competitors in the Late Pleistocene of Poço Redondo, *E.*  
585 *laurillardi* (Table 5, Figure 7), followed by *Toxodon platensis*.

586

### 587 **Figure 7**

588

#### 589 *3.5. Paleoenvironmental reconstruction*

590

591 The available isotopic data from extant megamammals from Kenya and Tanzania  
592 (Table 3; Figure 3A) provide us a good portrait of meso-megaherbivores fauna from

593 Africa, with a predominance of grazer species with high consumption of C<sub>4</sub> plants ( $p_i =$   
594 92-100 %; Table 3), and where even mixed-feeder and browser species had a high  
595 consumption of grass ( $p_i = 21-58$  %). Roots consumption was low ( $p_i = 1-24$  %; values  
596 for *H. amphibius* represents C<sub>3</sub> aquatic plants). Based on *Loxodonta africana*  $\delta^{18}\text{O}_{\text{water}}$   
597 we estimate a Mean Annual Temperature - MAT around  $29\pm 3$  °C for Africa.

598 Using regressions proposed by Coe *et al.* (1976) for our Africa mammal  
599 assemblage, we found similar values of Energy Expenditure, Biomass, Production and  
600 Annual Precipitation for assemblies in wildlife areas in Kenya and Tanzania (Table 6),  
601 which show us that we have enough information to estimate the same measures in Late  
602 Pleistocene meso-megaherbivores fauna from Poço Redondo, Sergipe, Brazil.

603 In the Late Pleistocene of Sergipe the available data of meso-megaherbivores  
604 fauna shows a mammal assemblage composed of mixed-feeders and grazer species  
605 (Table 3). They fed more on C<sub>4</sub> grass ( $p_i = 59-94$  %) than the extant fauna from Africa,  
606 which could indicate that they lived in a more open and drier environments. Another  
607 evidence is that this fauna fed more on roots than Africa fauna ( $p_i = 6-41$  %; Table 3),  
608 which in combination to the high values of  $\delta^{18}\text{O}_{\text{water}}$  found in *N. platensis*, suggests a  
609 drier environment than in Africa, with high MAT ( $37\pm 6$  °C, Table 6).

610 Biomass (4,733 kg/km<sup>2</sup>) and Secondary Production (1,192 kg/km<sup>2</sup>.yr) were  
611 similar to that found in wildlife areas from Kenya and Tanzania (Table 6), however  
612 Energy Expenditure was high in Poço Redondo (35,049 kJ/km<sup>2</sup>.h). Another difference,  
613 although Poço Redondo was hotter than Africa nowadays, is that it had probably a  
614 similar Annual Precipitation, varying to our estimations between 585 to 832 mm. If the  
615 meso-megaherbivores lived in a drier environment, this could explain why they fed  
616 more on roots, as this is one of the main components of Net Primary Production (NPP)  
617 in Seasonal Dry Forests (Jaramillo *et al.*, 2011 and references therein).

618

## 619 **Conclusion**

620

621 In this paper we investigated isotopic data for Africa meso-megamammals to help  
622 understanding better the paleoecology of meso-megamammals from Late Pleistocene of  
623 Poço Redondo (Sergipe, Brazil). First of all, we estimated the weights of these taxa, and  
624 noticed that in Poço Redondo the vertebrate assemblage was composed at least by one  
625 megacarnivore (*S. populator*,  $w = 315$  kg), one small carnivore (*C. latirostris*,  $w = \sim 60$   
626 kg), one omnivore (*P. brasiliense*,  $w = 38$  kg), six mesoherbivores (*H. paulacoutoi*  $w =$

627 120 Kg; *P. major*,  $w = 285$  kg; *E. (A.) neogeus*,  $w = 420$  kg; *Glyptotherium* sp.,  $w = 710$   
628 kg; *C. cuvieri*,  $w = 777$  Kg; and *Panochthus* sp.,  $w = 785$  kg;) and three megaherbivores  
629 (*T. platensis*,  $w = 1,770$  kg; *E. laurillardii*,  $w = 3,416$  kg; and *N. platensis*,  $w = 6,265$   
630 kg).

631 The herbivore fauna had a high consumption of C<sub>4</sub> grass, belonging to two guilds:  
632 grazers ( $p_i$ C<sub>4</sub> grass > 90%; *N. platensis*) and Mixed Feeders (*Glyptotherium* sp; *E.*  
633 *neogeus*; *T. platensis*; *H. paulacoutoi*; *Panochthus* sp.; *C. cuvieri*; *E. laurillardii*; and *P.*  
634 *major*).

635 *Smilodon populator* could fed on meso-megaherbivores weighting between 285  
636 kg to 6,300 kg ( $p_i = 67$  %), eventually could have hunted *C. latirostris* ( $p_i = 10$  %), and  
637 we suggests that acted as scavengers feeding in carcass of *Pachyarmatherium*  
638 *brasilense* ( $p_i = 11$  %) and *H. paulacoutoi* ( $p_i = 12$  %). Beside this, we suggest that *C.*  
639 *latirostris* could act as a scavenger, feeding on dead corpses of these meso-  
640 megamammals, among which *N. platensis* ( $p_i = 44$  %) was a great contributor based on  
641 its isotopic signature.

642 Through niche overlap (*O*) and intra-interspecific (*IC/SC*) indexes we noticed that  
643 in meso-megamammals of Africa that mixed-feeders are better competitors than  
644 grazers, allowing to suggest that *Eremotherium laurillardii* ( $w = 3,416$  kg;  $B_A = 0.23$ )  
645 and *Toxodon platensis* ( $w = 1,770$  kg;  $B_A = 0.24$ ), respectively, were the best resources  
646 competitors in the Late Pleistocene mammal assemblage of Poço Redondo, indicating  
647 that large weights are important to determine a good competitor.

648 Finally, we suggest that the meso-megamammals from the Late Pleistocene of  
649 Poço Redondo, Sergipe, lived in an open and dry environment similar to that found  
650 nowadays in Africa, with similar biomass and annual precipitation, but hotter and with a  
651 higher energy expenditure for the megafauna.

652

### 653 **Acknowledgements**

654

655 To CNPq by financial support through Universal project (process 404684/2016-  
656 5); To Dr. Alexandre Liparini (Laboratório de Paleontologia/UFS) and Dr. Castor  
657 Cartelle (PUC/MG) for allow measurements in fossils collection that they are  
658 responsible for; To biologists Verônica Gomes and Lais Alves for help in Solver  
659 (Excel) analysis; And for Dr. Hermínio Araujo Jr. and M.Sc. Lidiane Asevedo for  
660 critical evaluation of manuscript.

661

662 **References**

663

664 Anderson, J.F.; Hall Martin. A.; Russel, D.A., 1985. Long-bone circumference and  
665 weight in mammals, birds and dinosaurs. *J Zool* 207, 53-61.

666 Andrades, R.C. 2018. Nicho e endemismo em ambientes entremarés recifais: uma  
667 abordagem usando isótopos estáveis. Tese de Doutorado, Universidade Federal do  
668 Espírito Santo, Espírito Santo.

669 Arsenault, R. & Owen-Smith, N. 2011. Competition and coexistence among short-grass  
670 grazers in the Hluhluwe-iMfolozi Park, South Africa. *Can J Zool* 89, 900-907. doi:  
671 10.1139/Z11-067

672 Ayliffe, L.K., Lister, A.M., Chivas, A.R. 1992. The preservation of glacial-interglacial  
673 climatic signatures in the oxygen isotopes of elephant skeletal phosphate.  
674 *Palaeogeogr Palaeoclimatol Palaeoecol* 99, 179–191.

675 Azevedo, F. C. C. & Verdade, L. M. 2011. Predator–prey interactions: jaguar predation  
676 on caiman in a floodplain forest. *Journal of Zoology* 286: 200–207.  
677 doi:10.1111/j.1469-7998.2011.00867.x

678 Bargo, M.S.; De Iuliis, G.; Vizcaíno, S.F., 2006a. Hypsodonty in Pleistocene ground  
679 sloths. *Acta Palaeontol Pol* 51(1), 53-61.

680 Bargo, M.S.; Toledo, N.; Vizcaíno, S.F., 2006b. Muzzle of South American Pleistocene  
681 ground sloths (*Xenarthra*, Tardigrada). *J Morphol* 267, 248-263.

682 Bocherens, H.; Cotte, M.; Bonini, R.; Scian, D.; Straccia, P.; Soibelzon, L.; Prevosti,  
683 F.J. 2016. Paleobiology of sabretooth cat *Smilodon populator* in the Pampean  
684 Region (Buenos Aires Province, Argentina) around the Last Glacial Maximum:  
685 Insights from carbon and nitrogen stable isotopes in bone collagen. *Palaeogeogr*  
686 *Palaeoclimatol Palaeoecol* 449, 463–474. doi: 10.1016/j.palaeo.2016.02.017

687 Bocherens, H.; Drucker, D.G. 2013. Terrestrial Teeth and Bones. In: Elias S.A. (ed.).  
688 *The Encyclopedia of Quaternary Science* 1, 304-314. Amsterdam: Elsevier.

689 Bocherens, H.; Koch, P.L.; Mariotti, A.; Geraards, D.; Jaeger, J.J. 1996. Isotopic  
690 biogeochemistry ( $^{13}\text{C}$ ,  $^{18}\text{O}$ ) of mammalian enamel from African Pleistocene  
691 hominid sites. *Palaios* 11, 306–318.

692 Boer, W.F.; Van Oort, J.W.A.; Grover, M.; Peel, M.J.S. 2015. Elephant-mediated  
693 habitat modifications and changes in herbivore species assemblages in Sabi Sand,  
694 South Africa. *Eur J Wildl Res* 61, 491–503. doi: 10.1007/s10344-015-0919-3



- 695 Bryant, J.D.; Koch, P.L.; Froelich, P.N.; Showers, W.J.; Genna, B.J. 1996. Oxygen  
696 isotope partitioning between phosphate and carbonate in mammalian apatite.  
697 *Geochimica et Cosmochimica Acta* 60 (24), 5145–5148.
- 698 Cartelle, C.; Abuhid, V.S. 1989. Novos espécimes brasileiros de *Smilodon populator*  
699 Lund, 1842 (Carnivora, Machairodontinae): morfologia e conclusões taxonômicas.  
700 *In: Congresso Brasileiro de Paleontologia*, 11, 1989. Anais, Curitiba, 1, 607-620.
- 701 Castro, M.C. de; Langer, M.C. 2008. New postcranial remains of *Smilodon populator*  
702 Lund, 1842 from south-central Brazil. *Rev Bras Paleontolog*, 11(3), 199-206. doi:  
703 10.4072/rbp.2008.3.06
- 704 Cerling, T.E.; Harris, J.M. 1999. Carbon isotope fractionation between diet and  
705 bioapatite in ungulate mammals and implications for ecological and  
706 paleoecological studies. *Oecologia* 120, 347–363.
- 707 Cerling, T.E.; Harris, J.M.; Hart, J.A.; Kaleme, P.; Klingel, H.; Leakey, M.G.; Levin,  
708 N.E.; Lewison, R.L.; Passey, B.H. 2008. Stable isotope ecology of the common  
709 hippopotamus. *J Zool* 276, 204-212. doi:10.1111/j.1469-7998.2008.00450.x
- 710 Cernusak, L.A.; Tcherkez, G.; Keitel, C.; Cornwell, W.K.; Santiago, L.S.; Knohl, A.  
711 Barbour, M.M.; Williams, D.G.; Reich, P.B.; Ellsworth, D.S.; Dawson, T.E.;  
712 Griffiths, H.G.; Farquhar, G.D.; Wright, I. 2009. Why are non-photosynthetic  
713 tissues generally <sup>13</sup>C enriched compared with leaves in C<sub>3</sub> plants? Review and  
714 synthesis of current hypotheses. *Funct Plant Biol* 36(3), 199-213.  
715 doi: 10.1071/FP08216
- 716 Cherkinsky, A. 2009. Can we get a good radiocarbon age from “bad bone”?  
717 Determining the reliability of radiocarbon age from bioapatite. *Radiocarbon*  
718 51(2):647-655.
- 719 Christiansen, P.; Harris, J.M. 2005. Body size of *Smilodon* (Mammalia, Felidae). *J*  
720 *Morphol* 266, 369-384.
- 721 Coe, M.J.; Cumming D.H.; Phillipson, J. 1976. Biomass and production of large  
722 African herbivores in relation to rainfall and primary production. *Oecologia* 22,  
723 341-354.
- 724 Coplen, T.B. 1994. Reporting of stable hydrogen, carbon, and oxygen isotopic  
725 abundances. *Pure Appl Chem* 66, 273–276.
- 726 Cumming, D. H. M. 1982. The influence of large herbivores on Savanna structure in  
727 Africa. *In: Huntley, B. J. & Walker, B. H. (eds.). Ecology of Tropical Savannas,*  
728 304-314. New York: Springer.



- 729 Damuth, J. 1981. Population density and body size in mammals. *Nature* 290: 699-700.
- 730 Damuth, J. 1993. Cope's rule, the island rule and the scaling of mammalian population  
731 density. *Nature* 365: 748-750.
- 732 Dantas, M. A. T. & Zucon, M. H. 2007. Occurrence of *Catonyx cuvieri* (Lund, 1839)  
733 (Tardigrada, Scelidotheriinae) in Late Pleistocene-Holocene of Brazil. *Rev. bras.*  
734 *paleontol.* 10(2):129-132.
- 735 Dantas, M.A.T.; Cherkinsky, A.; Bocherens, H.; Drefahl, M.; Bernardes, C.; França, L.  
736 de M. 2017. Isotopic paleoecology of the Pleistocene megamammals from the  
737 Brazilian Intertropical Region: Feeding ecology ( $\delta^{13}\text{C}$ ), niche breadth and overlap.  
738 *Quat Sci Rev* 170, 152-163. doi: 10.1016/j.quascirev.2017.06.030
- 739 Dantas, M.A.T.; Porpino, K.O.; Bauermann, S.G.; Prata, A.P.N.; Cozzuol, M.A.;  
740 Kinoshita, A.; Barbosa, J.H.O.; Baffa, O. 2011. Megafauna do Pleistoceno superior  
741 de Sergipe, Brasil: registros taxonômicos e cronológicos. *Rev Bras Paleontolog*  
742 14(3), 311–320. doi:10.4072/rbp.2011.3.10
- 743 Dixon, D.M. 1989. A note on some scavengers of ancient Egypt. *World Archaeol* 21(2),  
744 193-197.
- 745 Downing, K.F.; White, R.S. 1995. The cingulates (Xenarthra) of the Leisey Shell Pit  
746 local fauna (Irvingtonian), Hillsborough County, Florida. *Bull Florida Mus Nat Hist*  
747 37, 375-396.
- 748 Fariña, R.A.; Vizcaíno, S.F.; Bargo, M.S. 1998. Body mass estimations in Lujanian  
749 (late Pleistocene-early Holocene of South America) mammal megafauna.  
750 *Mastozool Neotrop* 5, 87-108.
- 751 França LM, Dantas MAT, Bocchiglieri A, Cherkinsky A, Ribeiro AS, Bocherens H.  
752 Chronology and ancient feeding ecology of two upper Pleistocene megamammals  
753 from the Brazilian Intertropical Region. *Quat Sci Rev.* 2014a; 99:78-83. doi:  
754 10.1016/j.quascirev.2014.04.028
- 755 França, L. de M.; Fortier, D.C.; Bocchiglieri, A.; Dantas, M.A.T.; Liparini, A.;  
756 Cherkinsky, A.; Ribeiro, A. de S. 2014b. Radiocarbon dating and stable isotopes  
757 analyses of *Caiman latirostris* (Daudin, 1801) (Crocodylia, Alligatoridae) from the  
758 late Pleistocene of Northeastern Brazil, with comments on spatial distribution of the  
759 species. *Quat Int* 352, 159-163. doi: 10.1016/j.quaint.2014.06.046
- 760 Gillette, D. D. & Ray, C. E. 1981. Glyptodonts of North America. – *Smithsonian*  
761 *Contributions to Paleobiology*, 40: 1-255.
- 762 Hammer, Ø., Harper, D.A.T., Ryan, P.D., 2001. PAST: Paleontological Statistics

- 763 Software Package for Education and Data Analysis. *Palaeontol Electron* 4: 1–9.
- 764 Jaramillo, V. J.; Martínez-Yrizar, A.; Sanford Jr., R. L. 2011. Primary Productivity and  
765 Biogeochemistry of Seasonally Dry Tropical Forests. Dirzo, R. et al. (eds.),  
766 Seasonally Dry Tropical Forests: Ecology and Conservation Island press. doi:  
767 10.5822/978-1-61091-021-7\_7
- 768 Jenkins, S.G.; Partridge, S.T.; Stephenson, T.R.; Farley, S.D.; Robbins, C.T. 2001.  
769 Nitrogen and carbon isotope fractionation between mothers, neonates, and nursing  
770 offspring. *Oecologia* 129, 336-341.
- 771 Keeling, C.D. 1979. The Suess effect: <sup>13</sup>Carbon-<sup>14</sup>Carbon interrelations. *Environ Int* 2,  
772 229–300.
- 773 Kigston, J.D.; Harrison, T. 2007. Isotopic dietary reconstructions of Pliocene herbivores  
774 at Laetoli: Implications for early hominin paleoecology. *Palaeogeogr*  
775 *Palaeoclimatol Palaeoecol* 243, 272–306. doi:10.1016/j.palaeo.2006.08.002
- 776 Kleynhans, E.J.; Jolles, A.E.; Bos, M.R.E.; Olf H. 2011. Resource partitioning along  
777 multiple niche dimensions in differently sized African savanna grazers. *Oikos* 120:  
778 591–600. doi: 0.1111/j.1600-0706.2010.18712.x
- 779 Landman M, Schoeman DS, Kerley GIH. Shift in Black Rhinoceros Diet in the  
780 Presence of Elephant: Evidence for Competition? *PLoS ONE*. 2013; 8(7):e69771.  
781 doi:10.1371/journal.pone.0069771
- 782 Levins, R. 1968. Evolution in changing environments. New Jersey, Princeton University  
783 Press, IX+120p.
- 784 MacFadden, B.J. 2005. Diet and habitat of toxodont megaherbivores (Mammalia,  
785 Notoungulata) from the late Quaternary of South and Central America. *Quat Res*  
786 64, 113–124.
- 787 Marcolino, C.P.; Isaias, R.M. dos S.; Cozzuol, M.A.; Cartelle, C.; Dantas, M.A.T. 2012.  
788 Diet of *Palaeolama major* (Camelidae) of Bahia, Brazil, inferred from coprolites.  
789 *Quat Int* 278, 81-86. doi:10.1016/j.quaint.2012.04.002
- 790 Marshall, J.D.; Brooks, J.R.; Lajtha, K. 2007. Sources of variation in the stable isotopic  
791 composition of plants. In Michemer, K. (Eds.), *Stable Isotopes in Ecology and*  
792 *Environmental Science*, second ed. Blackwell Publishing, Malden, MA, pp. 22-60.
- 793 Meers, M.B. 2003. Maximum bite force and prey size of *Tyrannosaurus rex* and their  
794 relationships to the inference of feeding behavior. *Hist Biol* 16(1), 1-12.

- 795 Molena, F.P. 2012. Variação individual no esqueleto apendicular de mastodontes  
796 (Proboscidea: Gomphotheriidae) provenientes de São Bento do Una, Pernambuco,  
797 Brasil. Dissertação de Mestrado, Universidade de São Paulo, São Paulo.
- 798 Nelson, S.V. 2013. Chimpanzee fauna isotopes provide new interpretations of fossil ape  
799 and hominin ecologies. *Proc R Soc B* 280, 20132324. doi: 10.1098/rspb.2013.2324
- 800 Oliveira, A.M.; Becker-Kerber, B.; Cordeiro, L.M.; Borghezan, R.; Avilla, L.S.;  
801 Pacheco, M.L.A.F.; Santos, C.M.D. 2017. Quaternary mammals from Central  
802 Brazil (Serra da Bodoquena, Mato Grosso do Sul) and comments on  
803 Paleobiogeography and Paleoenvironments. *Rev Bras Paleontolog* 20(1), 31-44.  
804 doi: 10.4072/rbp.2017.1.03
- 805 Oliveira, E.V.; Porpino, K.O.; Barreto, A.F. 2010. On the presence of *Glyptotherium* in  
806 the Late Pleistocene of Northeastern Brazil, and the status of “*Glyptodon*” and  
807 “*Chlamydotherium*”. Paleobiogeographic implications. *N Jb Geol Paläont Abh* 258,  
808 353–363. doi: 10.1127/0077-7749/2010/0116
- 809 Owen-Smith, N. 1982. Factors influencing the consumption of plant products by large  
810 herbivores. In: Huntley, B.J. and Walker, B.H eds. *The ecology of tropical*  
811 *savannas*. Springer- Verlag. Berlin, 359-404.
- 812 Pérez-Higareda, G.; Rangel-Rangel, A.; Smith, H.M.; Chiszar, D. 1989. Comments on  
813 the Food and Feeding Habits of Morelet's Crocodile. *Copeia* 4, 1039-1041.
- 814 Perrin, M.R. & Brereton-Stiles, R. 1999. Habitat use and feeding behavior of the buffalo  
815 and the white rhinoceros in the Hluhluwe-Umfolozi Game Reserve. *S. Afr. J.*  
816 *Wildl. Res.* 29(3): 72-80.
- 817 Phillips, D.L. 2012. Converting isotope values to diet composition: the use of mixing  
818 models. *J Mammal* 93(2), 342–352. doi: 10.1644/11-MAMM-S-158.1
- 819 Pianka, E.R. 1973. The structure of lizard communities. *Annu Rev Ecol Syst* 4, 53-74.
- 820 Porpino, K. de O.; Bergqvist, L.P. 2002. Novos achados de *Panochthus* (Mammalia,  
821 Cingulata, Glyptodontidae) no nordeste do Brasil. *Rev Bras Paleontolog*, 4, 51-62.
- 822 Porpino, K. de O.; Fernicola, J.C.; Bergqvist, L.P. 2009. A new Cingulate (Mammalia:  
823 Xenarthra) *Pachyarmatherium brasiliense* sp. nov. from the late Pleistocene of  
824 northeastern Brazil. *J Vert Paleontol* 29(3), 881-893.
- 825 Prevosti, F.J.; Martin, F.M. 2013. Paleoecology of the mammalian predator guild of  
826 Southern Patagonia during the latest Pleistocene: Ecomorphology, stable isotopes,  
827 and taphonomy. *Quat Int* 304, 74-84. doi: 10.1016/j.quaint.2012.12.039

- 828 Prevosti, F.J.; Vizcaíno, S.F. 2006. Paleoeecology of the large carnivore guild from the  
829 late Pleistocene of Argentina. *Acta Palaeontol Pol* 51, 407–422
- 830 Radloff, F.G.T.; Du Toit, J.T. 2004. Large predators and their prey in a southern  
831 African savanna: a predator’s size determines its prey size range. *J Anim Ecol* 73,  
832 410-423.
- 833 Ribeiro, R. da C.; Araújo-Júnior, H.I. de; Kinoshita, A.; Figueiredo, A.M.G.; Baffa, O.;  
834 Carvalho, I. de S. 2014. How much time is represented in the fossil record of tank  
835 deposits?. *In: Simpósio Brasileiro de Paleontologia de Vertebrados*, 9, 2014.  
836 *Paleontologia em Destaque*, 115.
- 837 Rozanski, K.L., Araguás-Araguás, L. and Conginatini, R. 1993. Isotopic Patterns in  
838 Modern Global Precipitation. *In: Swart, P.K., Lohmann, K.C., Mckenzie, J. and*  
839 *Savin, S., Eds., Climate Change in Continental Isotopic Records, Geophysical*  
840 *Monograph Series Vol. 78, American Geophysical Union, Washington DC, 1-36.*
- 841 Tejada-Lara, J.V.; MacFadden, B.J.; Bermudez, L.; Rojas, G.; Salas-Gismondi, R.;  
842 Flynn, J.J. 2018. Body mass predicts isotope enrichment in herbivorous mammals.  
843 *Proc. R. Soc. B* 285: 20181020. doi: 10.1098/rspb.2018.1020
- 844 Vizcaíno, S.F. 2009. The teeth of the “toothless”: novelties and key innovations in the  
845 evolution of xenarthrans (Mammalia, Xenarthra). *Paleobiol* 35, 343–366.
- 846 Vizcaino, S.F.; Bargo, M.S.; Cassini, G.H. 2006. Dental occlusal surface area in relation  
847 to body mass, food habits and other biological features in fossil xenarthrans.  
848 *Ameghiniana* 43(1), 11-26.
- 849 Yann, L.T.; DeSantis, L.R.G.; Haupt, R.J.; Romer, J.L.; Corapi, S.E.; Ettenson, D.J.  
850 2013. The application of an oxygen isotope aridity index to terrestrial  
851 paleoenvironmental reconstructions in Pleistocene North America. *Paleobiol* 39(4),  
852 576-590. doi: 10.1666/12059
- 853 Yoneyama, T.; Ohtani, T. 1983. Variations of natural <sup>13</sup>C abundances in leguminous  
854 plants. *Plant & Cell Physiol* 24(6), 971-977.
- 855
- 856 **Figure 1.** Brazilian Intertropical Region map (*sensu* Oliveira *et al.*, 2017) showing Poço  
857 Redondo municipality in Sergipe state, Brazil.
- 858
- 859 **Figure 2.** Correlation between  $\delta^{13}\text{C}$  and  $\delta^{18}\text{O}$  values of (A) *Loxodonta africana* and (B)  
860 *Notiomastodon platensis*.
- 861

862 **Figure 3.** (A) Principal Component Analyses (PCA) using  $\delta^{18}\text{O}$  and  $\delta^{13}\text{C}$  values for  
863 meso-megaherbivores from Africa and Poço Redondo (Sergipe, Brazil); (B) Dendrogram  
864 with clustering of taxa according to their ecological guilds (Bootstrap test, N = 10.000).

865

866 **Figure 4.** (A) Two *Smilodon populator* stalking a *Palaeolama major* group, while two  
867 *Caiman latirostris* are scavenging a *Notiomastodon platensis* corpse; (B) Pleistocene  
868 megamammals from Sergipe, Brazil (Image: Julio Lacerda, 2018). **Legends.** Cc -  
869 *Catonyx cuvieri*, En - *Equus (Amerhippus) neogeus*, Np - *Notiomastodon platensis*, Cl -  
870 *Caiman latirostris*, Pm - *Palaeolama major*, Sp - *Smilodon populator*, P - *Panochthus*  
871 sp., Tp - *Toxodon platensis*, G - *Glyptotherium* sp., Hp - *Holmesina paulacoutoi*, Pb -  
872 *Pachyarmatherium brasiliense*, El - *Eremotherium laurillardi*.

873

874 **Figure 5.** Isotopic ( $\delta^{18}\text{O}$  and  $\delta^{13}\text{C}$ ) trophic web from pleistocenic meso-megamammals  
875 from Sergipe, Brazil. **Legends.** bold arrows - food resources that contributed more than  
876 10% in isotopic signature of consumer; thin arrow - food resources that contributed less  
877 than 10% in isotopic signature of consumer.

878

879 **Figure 6.** (A) Isotopic niche overlap (*O*). Intraspecific competition (*IC*) and  
880 Interspecific competition (*SC*) of extant megamammals from Africa, (B) *L. africana*,  
881 (C) *E. quagga*, (D) *D. bicornis*, (E) *C. simum*, (F) *C. taurinus*, (G) *S. caffer*, (H) *K.*  
882 *ellipsiprymnus*, (I) *O. beisa*, (J) *G. camelopardalis*, (K) *H. amphibius*.

883

884 **Figure 7.** (A) Isotopic niche overlap (*O*). Intraspecific competition (*IC*) and  
885 Interspecific competition (*SC*) of pleistocenic megamammals from Sergipe, Brazil, (B)  
886 *E. laurillardi*, (C) *C. cuvieri*, (D) *H. paulacoutoi*, (E) *Glyptotherium* sp., (F) *Panochthus*  
887 sp., (G) *T. platensis*, (H) *N. platensis*, (I) *P. major*, (J) *E. (A.) neogeus*.

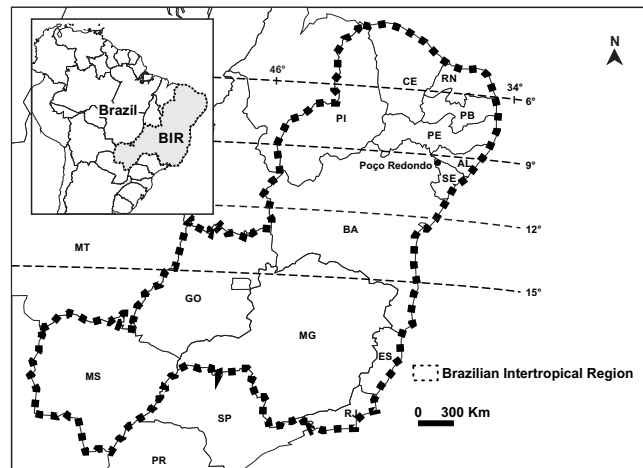

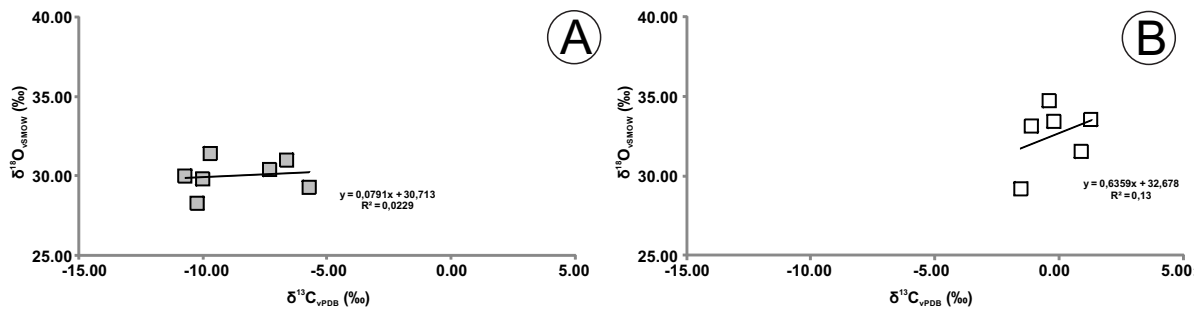



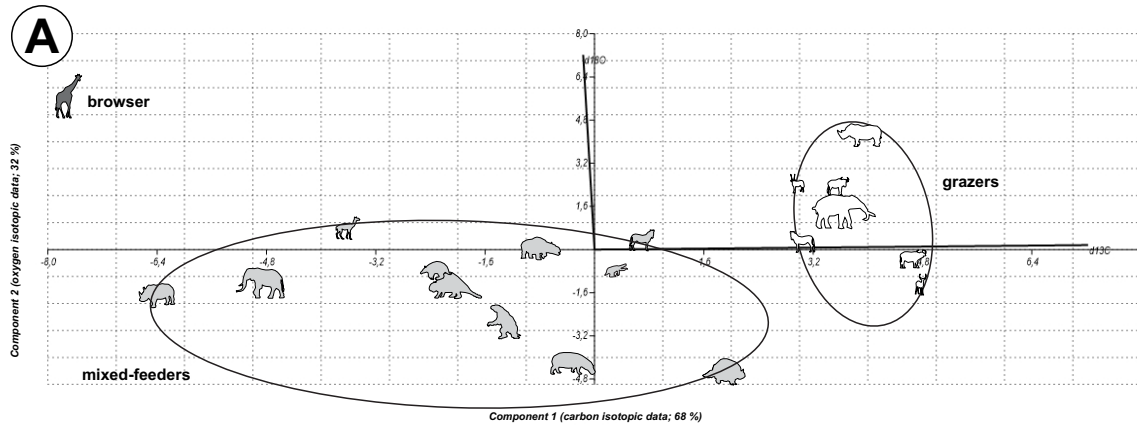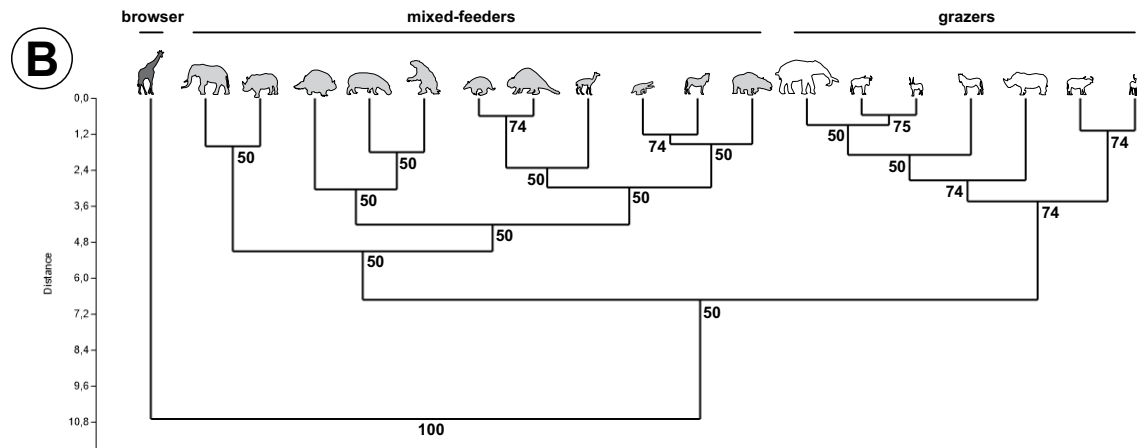

| meso-megaherbivores from Africa |                              | meso-megaherbivores from Poço Redondo, SE, Brasil |                                |
|---------------------------------|------------------------------|---------------------------------------------------|--------------------------------|
| <i>Giraffa camelopardalis</i>   | <i>Equus quagga</i>          | <i>Palaeolama major</i>                           | <i>Equus (A.) neogeus</i>      |
| <i>Diceros bicornis</i>         | <i>Oryx beisa</i>            | <i>Holmesina paulacoutoi</i>                      | <i>Glyptotherium sp.</i>       |
| <i>Loxodonta africana</i>       | <i>Connochaetes taurinus</i> | <i>Panochthus sp.</i>                             | <i>Notiomastodon platensis</i> |
| <i>Hippopotamus amphibius</i>   | <i>Syncerus caffer</i>       | <i>Toxodon platensis</i>                          | <i>Catonyx cuvieri</i>         |
| <i>Ceratotherium simum</i>      | <i>Kobus ellipsiprymnus</i>  | <i>Eremotherium laurillardi</i>                   |                                |

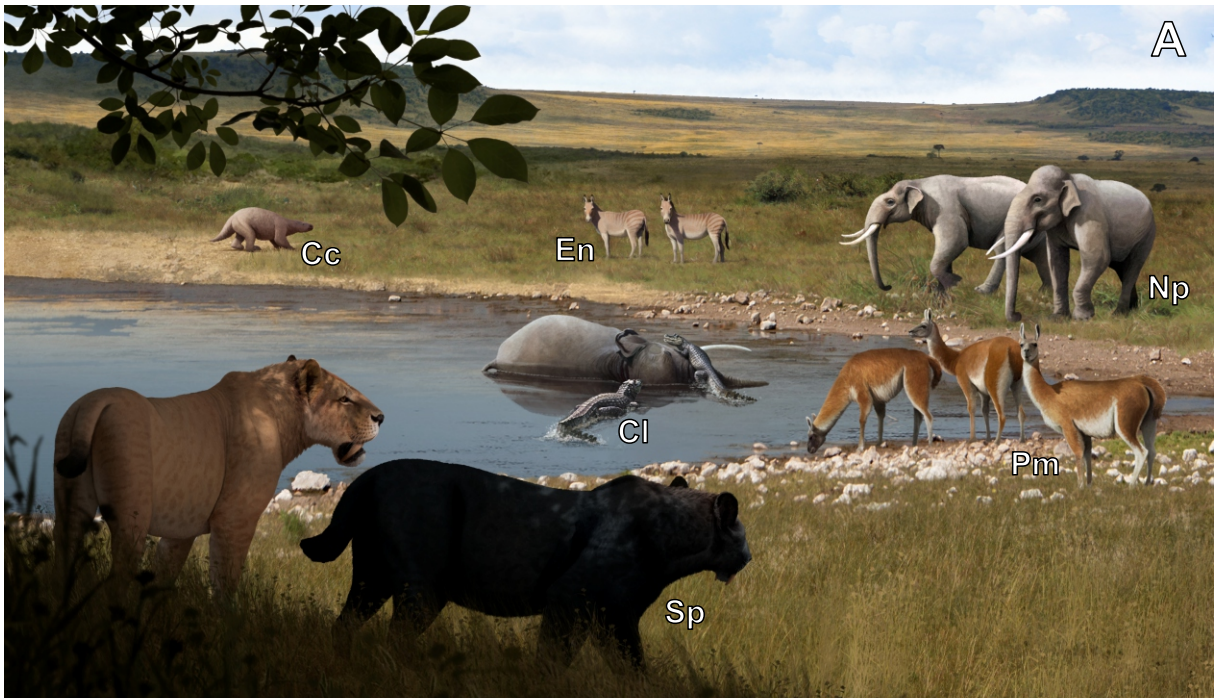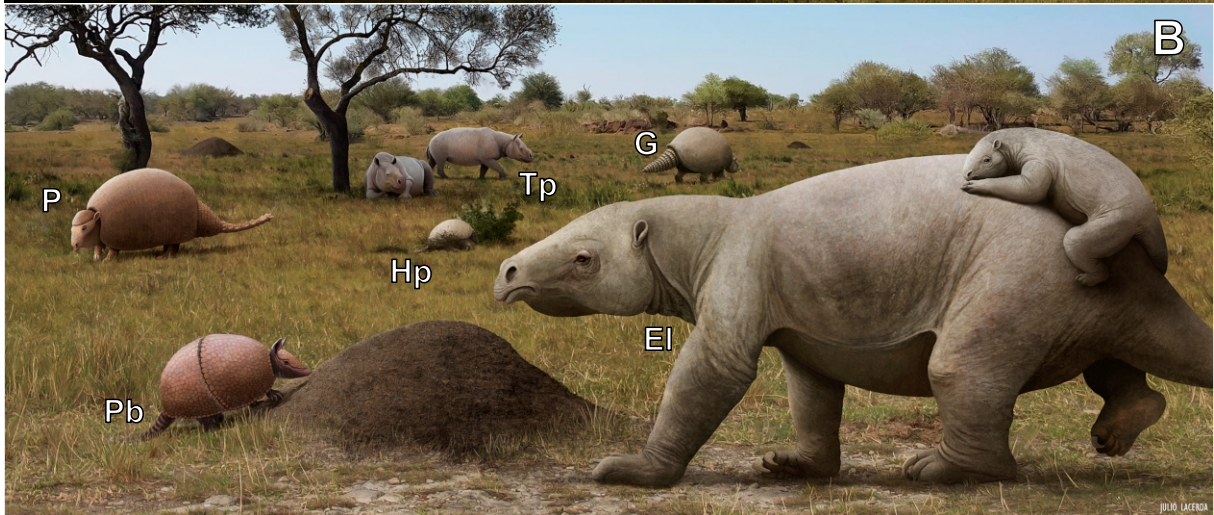

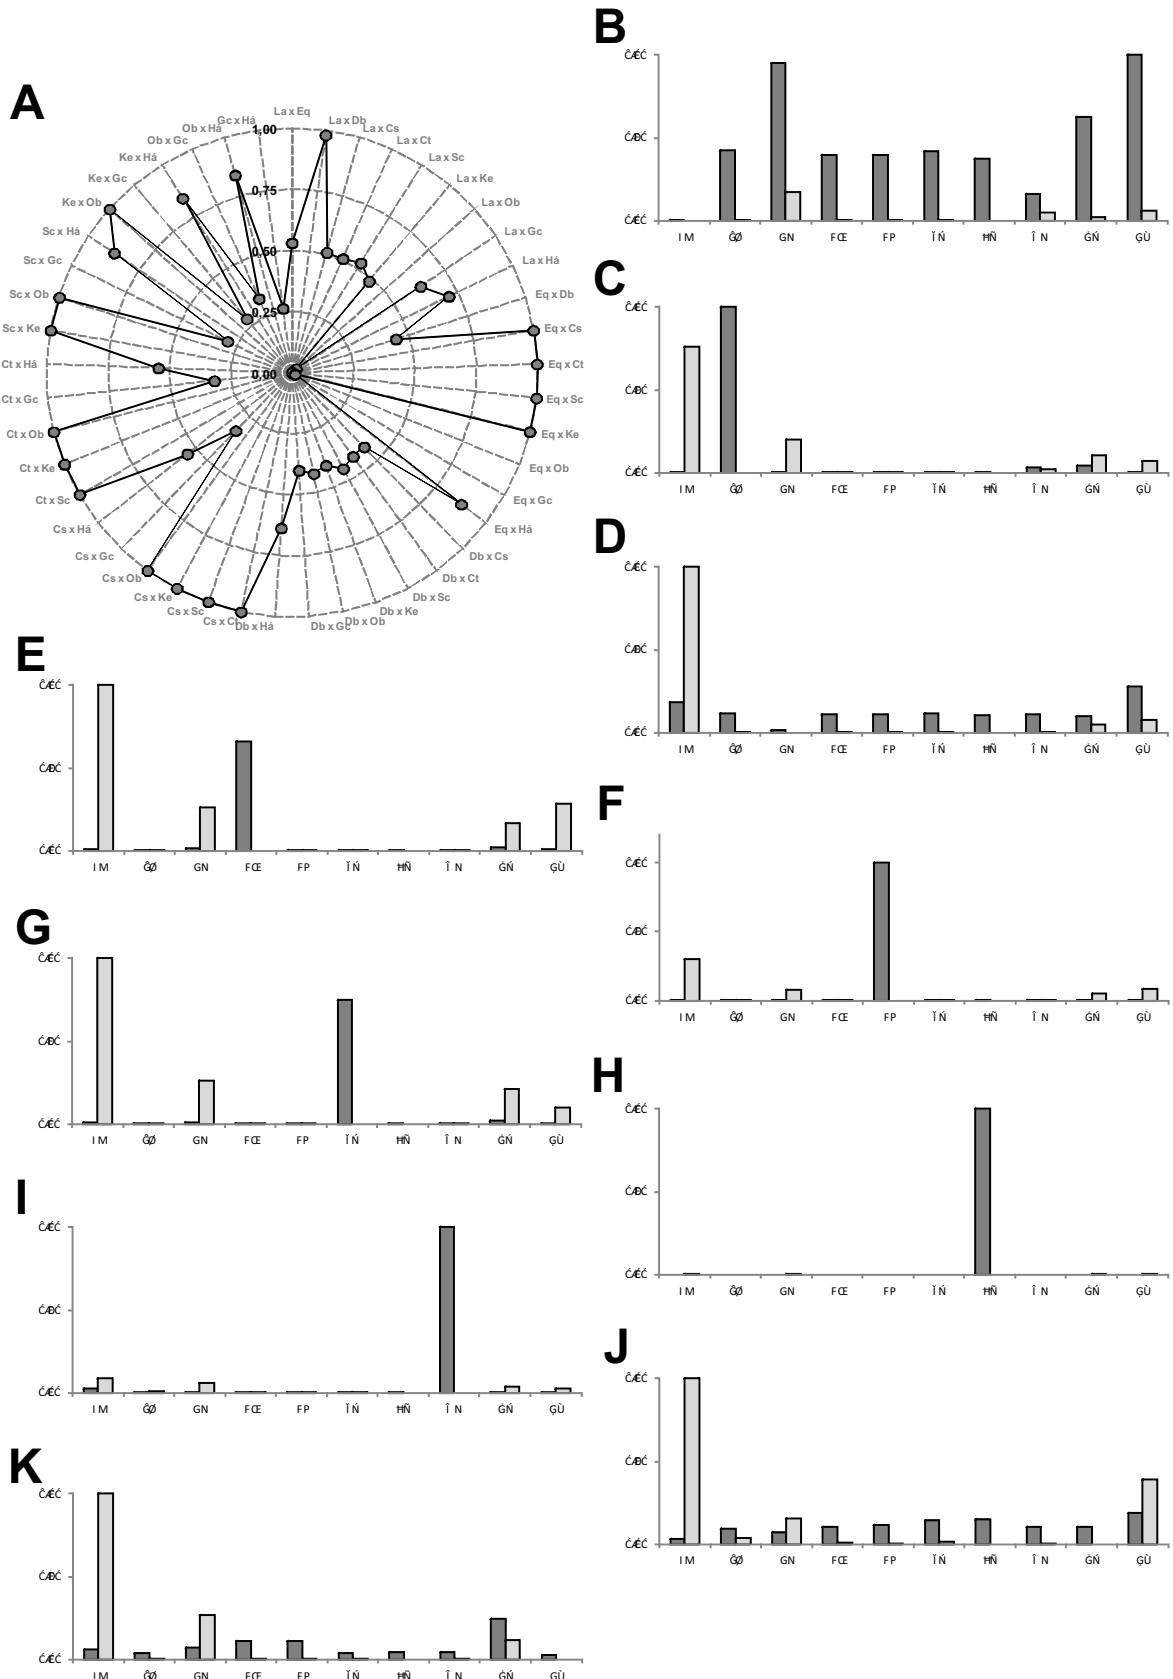

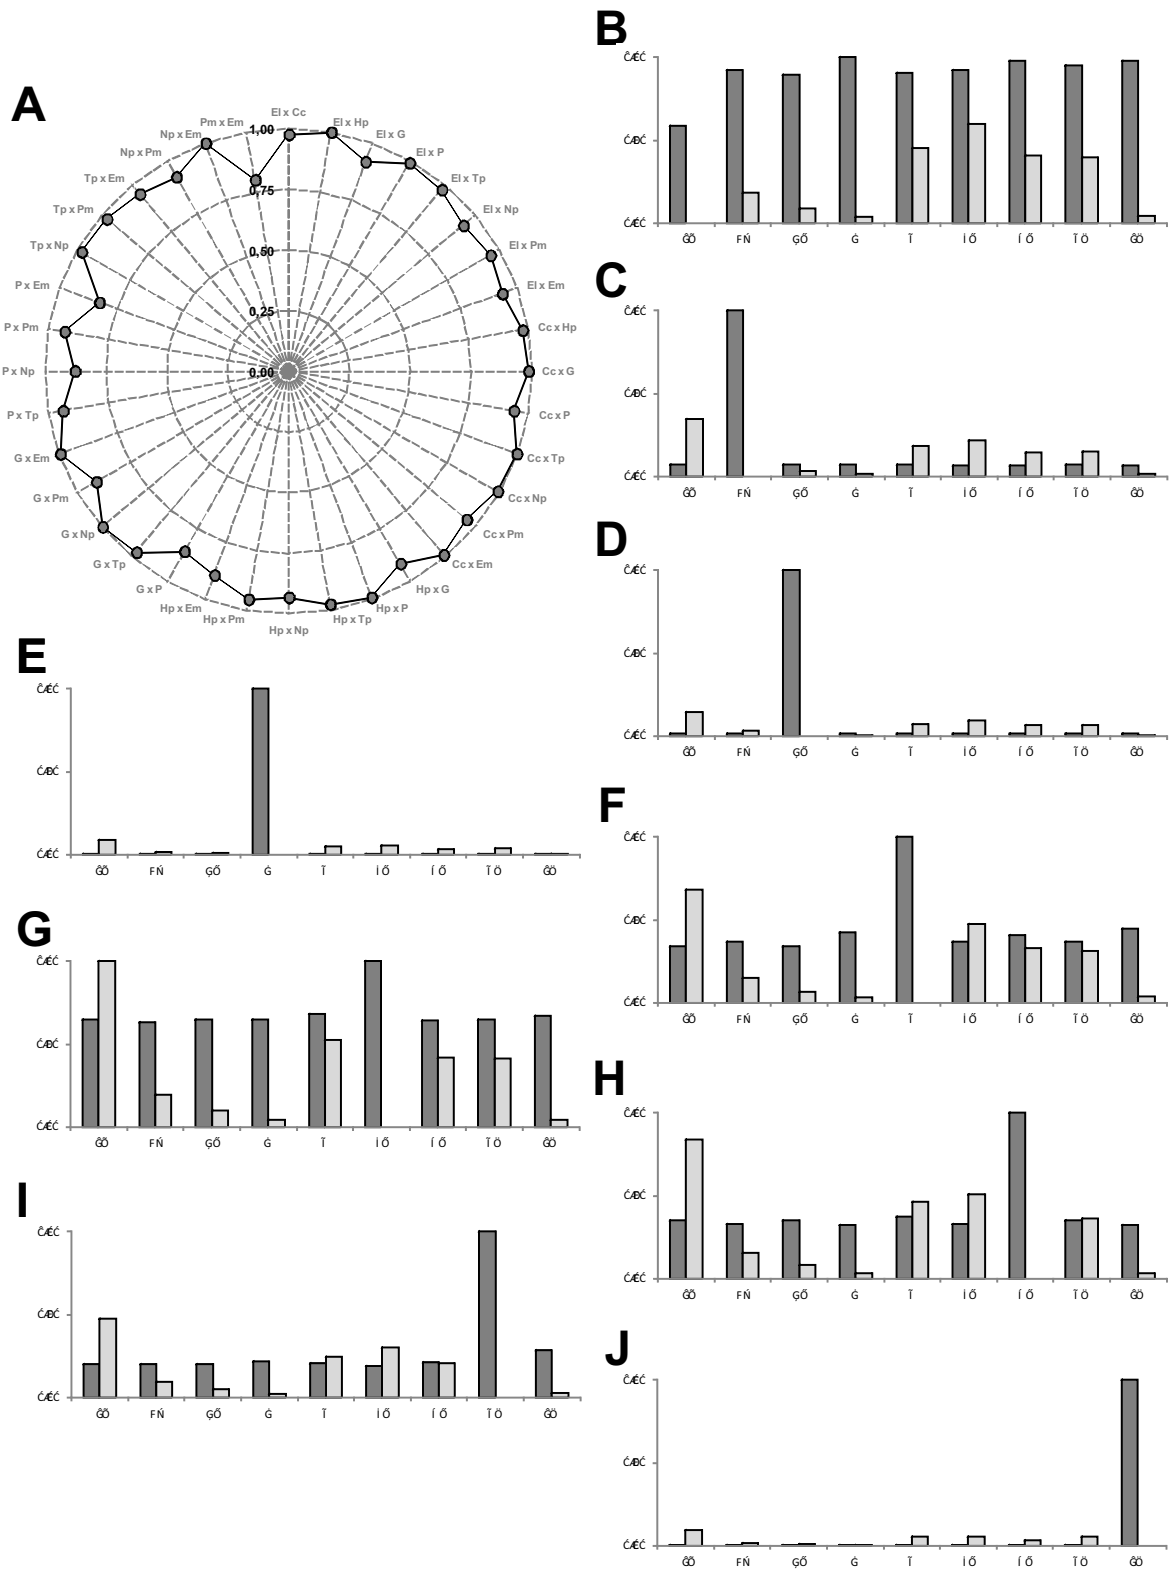

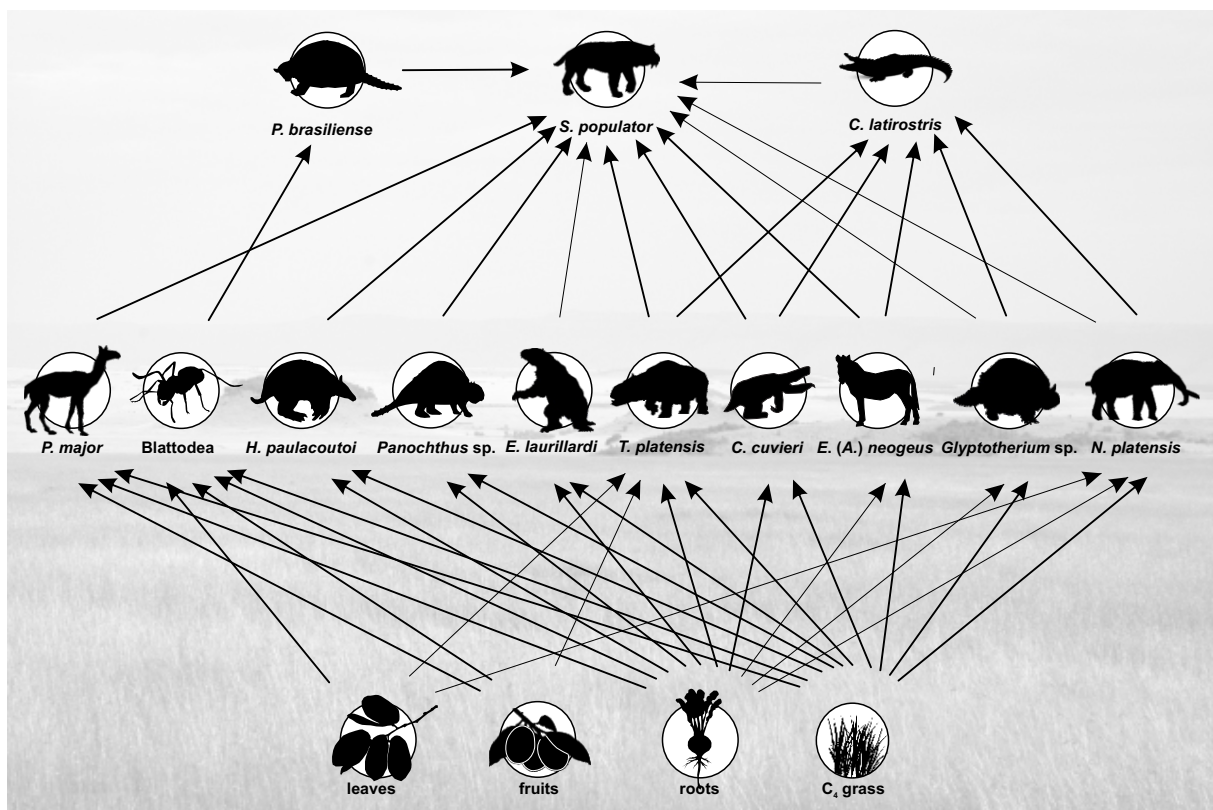



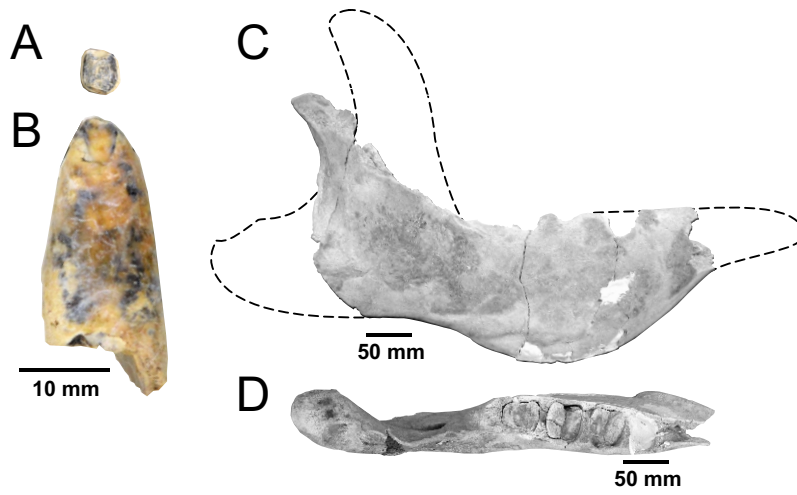

1 **Table 1.** Weight estimation from pleistocenic mammals from Brazilian Intertropical Region, and  
 2 their relatives in Argentina and Uruguay (Fariña *et al.*, 1998; Christiansen & Harris, 2005; Prevosti  
 3 & Vizcaino, 2006).

| <b>BIR</b>                          | <b>weight (Kg)</b> | <b>Argentina/Uruguay</b>            | <b>weight (Kg)</b> |
|-------------------------------------|--------------------|-------------------------------------|--------------------|
| <i>Eremotherium laurillardii</i>    | 3,416              | <i>Megatherium americanum</i>       | 3,800-6,070        |
| <i>Catonyx cuvieri</i>              | 777                | <i>Scelidotherium leptocephalum</i> | 633                |
| <i>Pachyarmatherium brasiliense</i> | 38                 | -                                   | -                  |
| <i>Holmesina paulacoutoi</i>        | 120                | -                                   | -                  |
| <i>Glyptotherium</i> sp.            | 710                | <i>Glyptodon</i> spp.               | 862-2,000          |
| <i>Panochthus</i> sp.               | 785                | <i>Panochthus</i> spp.              | 1,060-1,110        |
| <i>Toxodon platensis</i>            | 1,770              | <i>Toxodon platensis</i>            | 1,100-1,642        |
| <i>Notiomastodon platensis</i>      | 6,265              | <i>Notiomastodon platensis</i>      | 4,000-7,580        |
| <i>Palaeolama major</i>             | 285                | -                                   | -                  |
| <i>Equus (Amerhippus) neogeus</i>   | 420                | -                                   | -                  |
| <i>Smilodon populator</i>           | 315                | <i>Smilodon populator</i>           | 220-400            |

4  
 5 **Table 2.** Carbon ( $\delta^{13}\text{C}$ ) and oxygen ( $\delta^{18}\text{O}$ ) isotopic values used in two isotopic mathematical  
 6 mixing model. Carbon values were corrected based on  $\epsilon^*_{\text{diet-bioapatite}} \times \text{weight } (w)$  of studied  
 7 mammals. Oxygen values were corrected due differences found in proboscidean isotopic values in  
 8 Africa (*Loxodonta africana*) and Sergipe (*Notiomastodon platensis*).

| <b>Food resources</b>      | <b><math>\delta^{13}\text{C}</math></b>  |                                                              |                                                                 |                                             | <b><math>\delta^{18}\text{O}</math></b> |                         |
|----------------------------|------------------------------------------|--------------------------------------------------------------|-----------------------------------------------------------------|---------------------------------------------|-----------------------------------------|-------------------------|
|                            | <b><math>w &lt; 75 \text{ Kg}</math></b> | <b><math>75 \text{ Kg} &lt; w &lt; 600 \text{ Kg}</math></b> | <b><math>600 \text{ Kg} &lt; w &lt; 3,500 \text{ Kg}</math></b> | <b><math>w &gt; 3,500 \text{ Kg}</math></b> | <b>África</b>                           | <b>Sergipe (+2.5 ‰)</b> |
| <b>Leaves</b>              | -17.00                                   | -16.00                                                       | -15.00                                                          | -14.00                                      | 36.00                                   | 38.50                   |
| <b>Fruits</b>              | -15.00                                   | -14.00                                                       | -13.00                                                          | -12.00                                      | 28.00                                   | 30.50                   |
| <b>Roots</b>               | -13.00                                   | -12.00                                                       | -11.00                                                          | -10.00                                      | 24.00                                   | 26.50                   |
| <b>C<sub>4</sub> grass</b> | -1.00                                    | 0.00                                                         | 1.00                                                            | 2.00                                        | 32.00                                   | 34.50                   |

9



10 **Table 3.** Weight (t), mean values of proportional contributions ( $p_i$ ) of food sources (leaf, fruit, root, C<sub>4</sub> grass), carbon isotopes ( $\delta^{13}\text{C}$ ), standardized  
 11 isotopic niche breadth ( $B_A$ ), oxygen isotopes ( $\delta^{18}\text{O}$ ), and isotopic niche overlap ( $O$ ) for extant meso-megamammals from Africa and Pleistocene of  
 12 Sergipe. **References:** <sup>(1)</sup> Coe *et al.* (1976); <sup>(2)</sup> Our data.

| Taxa      | weight (t)          | N  | $p_i$ |       |      |       | mean $\pm$ s              |       |                           | $O$       |           |           |           |           |           |           |           |           |           |
|-----------|---------------------|----|-------|-------|------|-------|---------------------------|-------|---------------------------|-----------|-----------|-----------|-----------|-----------|-----------|-----------|-----------|-----------|-----------|
|           |                     |    | leaf  | fruit | root | grass | $\delta^{13}\text{C}$ (‰) | $B_A$ | $\delta^{18}\text{O}$ (‰) | <i>La</i> | <i>Eq</i> | <i>Db</i> | <i>Cs</i> | <i>Ct</i> | <i>Sc</i> | <i>Ke</i> | <i>Ob</i> | <i>Gc</i> | <i>Ha</i> |
| <i>La</i> | 5.00 <sup>(1)</sup> | 43 | 0.25  | 0.26  | 0.24 | 0.24  | -8.60 $\pm$ 2.01          | 0.84  | 30.03 $\pm$ 1.05          | -         | 0.53      | 0.98      | 0.51      | 0.51      | 0.53      | 0.49      | 0.02      | 0.63      | 0.71      |
| <i>Eq</i> | 0.29 <sup>(1)</sup> | 25 | 0.01  | 0.01  | 0.06 | 0.92  | -0.67 $\pm$ 0.13          | 0.06  | 31.28 $\pm$ 1.83          | 0.53      | -         | 0.45      | 1.00      | 1.00      | 1.00      | 1.00      | 0.00      | 0.01      | 0.87      |
| <i>Db</i> | 1.00 <sup>(1)</sup> | 30 | 0.21  | 0.34  | 0.24 | 0.21  | -10.12 $\pm$ 1.80         | 0.77  | 29.54 $\pm$ 1.34          | 0.98      | 0.45      | -         | 0.42      | 0.42      | 0.45      | 0.40      | 0.42      | 0.40      | 0.64      |
| <i>Cs</i> | 2.00 <sup>(1)</sup> | 03 | 0.04  | -     | -    | 0.96  | 0.30 $\pm$ 0.26           | 0.03  | 35.27                     | 0.51      | 1.00      | 0.42      | -         | 1.00      | 1.00      | 1.00      | 1.00      | 0.33      | 0.54      |
| <i>Ct</i> | 0.22 <sup>(1)</sup> | 08 | 0.03  | -     | 0.01 | 0.96  | -0.15 $\pm$ 1.37          | 0.03  | 33.36 $\pm$ 0.90          | 0.51      | 1.00      | 0.42      | 1.00      | -         | 1.00      | 1.00      | 1.00      | 0.32      | 0.54      |
| <i>Sc</i> | 0.66 <sup>(1)</sup> | 28 | 0.01  | 0.01  | 0.06 | 0.92  | 0.92 $\pm$ 1.38           | 0.06  | 30.63 $\pm$ 1.45          | 0.53      | 1.00      | 0.45      | 1.00      | 1.00      | -         | 1.00      | 1.00      | 0.29      | 0.87      |
| <i>Ke</i> | 0.20 <sup>(1)</sup> | 12 | -     | -     | -    | 1.00  | 1.00 $\pm$ 1.03           | 0.00  | 33.40 $\pm$ 0.90          | 0.49      | 1.00      | 0.40      | 1.00      | 1.00      | 1.00      | -         | 1.00      | 0.29      | 0.84      |
| <i>Ob</i> | 0.16 <sup>(1)</sup> | 05 | 0.04  | -     | -    | 0.96  | -0.70 $\pm$ 1.01          | 0.03  | 33.40 $\pm$ 1.70          | 0.02      | 0.00      | 0.42      | 1.00      | 1.00      | 1.00      | 1.00      | -         | 0.33      | 0.84      |
| <i>Gc</i> | 1.20 <sup>(1)</sup> | 15 | 0.77  | 0.01  | -    | 0.23  | -11.32 $\pm$ 1.93         | 0.18  | 37.01 $\pm$ 1.57          | 0.63      | 0.01      | 0.40      | 0.33      | 0.32      | 0.29      | 0.29      | 0.33      | -         | 0.27      |
| <i>Ha</i> | 1.40 <sup>(1)</sup> | 16 | 0.02  | 0.03  | 0.37 | 0.58  | -4.16 $\pm$ 1.50          | 0.35  | 26.90 $\pm$ 1.59          | 0.71      | 0.87      | 0.64      | 0.54      | 0.54      | 0.87      | 0.84      | 0.84      | 0.27      | -         |

13 **Legends.** *La* - *Loxodonta africana*, *Eq* - *Equus quagga*, *Db* - *Diceros bicornis*, *Cs* - *Ceratotherium simum*, *Ct* - *Connochaetes taurinus*, *Sc* - *Syncerus caffer*, *Ke* - *Kobus*  
 14 *ellipsiprymnus*, *Ob* - *Oryx beisa*, *Gc* - *Giraffa camelopardalis*, *Ha* - *Hippopotamus amphibius*.

15  
 16  
 17  
 18  
 19  
 20

21 **Table 3. (continuation).**

| Taxa      | weight (t)          | N  | <i>P<sub>i</sub></i> |       |      |       | mean±s                    |       |                           | <i>O</i>  |           |           |          |          |           |           |           |           |
|-----------|---------------------|----|----------------------|-------|------|-------|---------------------------|-------|---------------------------|-----------|-----------|-----------|----------|----------|-----------|-----------|-----------|-----------|
|           |                     |    | leaf                 | fruit | root | grass | $\delta^{13}\text{C}$ (‰) | $B_A$ | $\delta^{18}\text{O}$ (‰) | <i>El</i> | <i>Cc</i> | <i>Hp</i> | <i>G</i> | <i>P</i> | <i>Tp</i> | <i>Np</i> | <i>Pm</i> | <i>En</i> |
| <i>El</i> | 3.42 <sup>(2)</sup> | 15 | -                    | -     | 0.33 | 0.67  | -5.11±2.95                | 0.23  | 28.42±1.64                | -         | 0.98      | 1.00      | 0.92     | 0.99     | 0.98      | 0.93      | 0.96      | 0.93      |
| <i>Cc</i> | 0.78 <sup>(2)</sup> | 01 | -                    | -     | 0.20 | 0.80  | -3.46                     | 0.16  | 30.27                     | 0.98      | -         | 0.97      | 0.98     | 0.94     | 1.00      | 0.99      | 0.95      | 0.99      |
| <i>Hp</i> | 0.12 <sup>(2)</sup> | 01 | -                    | -     | 0.34 | 0.66  | -6.05                     | 0.27  | 30.36                     | 1.00      | 0.97      | -         | 0.92     | 0.99     | 0.98      | 0.93      | 0.96      | 0.89      |
| <i>G</i>  | 0.71 <sup>(2)</sup> | 01 | -                    | -     | 0.06 | 0.94  | -1.89                     | 0.04  | 26.47                     | 0.92      | 0.98      | 0.92      | -        | 0.86     | 0.97      | 1.00      | 0.91      | 1.00      |
| <i>P</i>  | 0.78 <sup>(2)</sup> | 01 | -                    | -     | 0.41 | 0.59  | -5.91                     | 0.31  | 29.79                     | 0.99      | 0.94      | 0.99      | 0.86     | -        | 0.94      | 0.88      | 0.94      | 0.83      |
| <i>Tp</i> | 1.77 <sup>(2)</sup> | 05 | 0.02                 | 0.06  | 0.20 | 0.72  | -4.88±3.32                | 0.24  | 32.16±1.65                | 0.98      | 1.00      | 0.98      | 0.97     | 0.94     | -         | 0.98      | 0.98      | 0.95      |
| <i>Np</i> | 6.30 <sup>(2)</sup> | 06 | 0.01                 | -     | 0.09 | 0.90  | -0.18±1.10                | 0.07  | 32.57±1.95                | 0.93      | 0.99      | 0.93      | 1.00     | 0.88     | 0.98      | -         | 0.92      | 1.00      |
| <i>Pm</i> | 0.28 <sup>(2)</sup> | 01 | -                    | 0.18  | 0.23 | 0.59  | -7.34                     | 0.44  | 31.94                     | 0.96      | 0.95      | 0.96      | 0.91     | 0.94     | 0.98      | 0.92      | -         | 0.80      |
| <i>En</i> | 0.42 <sup>(2)</sup> | 01 | -                    | -     | 0.08 | 0.92  | -3.02                     | 0.06  | 31.39                     | 0.93      | 0.99      | 0.89      | 1.00     | 0.83     | 0.95      | 1.00      | 0.80      | -         |

22 **Legends.** *El* - *Eremotherium laurillardi*, *Cc* - *Catonyx cuvieri*, *Hp* - *Holmesina paulacoutoi*, *G* - *Glyptotherium* sp., *P* - *Panochthus* sp., *Tp* - *Toxodon platensis*, *Np* - *Notiomastodon*  
23 *platensis*, *Pm* - *Palaeolama major*, *En* - *Equus (Amerhippus) neogeus*.

24  
25  
26  
27  
28  
29  
30  
31  
32

33 **Table 4.** Prey isotopic ( $\delta^{13}\text{C}$ ,  $\delta^{18}\text{O}$ ) contribution (%) to isotopic diet of two vertebrate carnivores  
34 from Sergipe, Brazil.

| Potential preys (weight in Kg)           | <i>Smilodon populator</i> | <i>Caiman latirostris</i> |
|------------------------------------------|---------------------------|---------------------------|
| <i>Smilodon populator</i> (315)          | -                         | -                         |
| <i>Caiman latirostris</i> (60)           | 0.10                      | -                         |
| <i>Eremotherium laurillardi</i> (3,416)  | 0.06                      | -                         |
| <i>Catonyx cuvieri</i> (777)             | 0.10                      | 0.12                      |
| <i>Pachyarmatherium brasiliense</i> (38) | 0.11                      | -                         |
| <i>Holmesina paulacoutoi</i> (120)       | 0.12                      | -                         |
| <i>Glyptotherium</i> sp. (710)           | 0.02                      | 0.10                      |
| <i>Panochthus</i> sp. (785)              | 0.12                      | -                         |
| <i>Toxodon platensis</i> (1,770)         | 0.12                      | 0.16                      |
| <i>Notiomastodon platensis</i> (6,300)   | 0.01                      | 0.44                      |
| <i>Palaeolama major</i> (285)            | 0.14                      | -                         |
| <i>Equus (Amerhippus) neogeus</i> (420)  | 0.10                      | 0.18                      |

35  
36  
37  
38  
39  
40  
41  
42  
43  
44  
45  
46  
47  
48  
49  
50  
51  
52  
53  
54  
55  
56  
57  
58

59 **Table 5.** Intraspecific (*IC*) and interspecific (*SC*) competition values for meso-megamammals from Africa and Pleistocene of Sergipe, Brazil.

| Taxa   | weight (t) | <i>IC/SC</i> |           |           |           |           |           |           |            |           |           |       |
|--------|------------|--------------|-----------|-----------|-----------|-----------|-----------|-----------|------------|-----------|-----------|-------|
|        |            | <i>La</i>    | <i>Eq</i> | <i>Db</i> | <i>Cs</i> | <i>Ct</i> | <i>Sc</i> | <i>Ke</i> | <i>Ob</i>  | <i>Gc</i> | <i>Ha</i> |       |
| Africa | <i>La</i>  | 5.00         | 0.19      | 16.79     | 37.73     | 15.82     | 15.75     | 16.68     | 14.80      | 6.39      | 24.79     | 39.74 |
|        | <i>Eq</i>  | 0.29         | 0.10      | 22.03     | 0.12      | 0.05      | 0.05      | 0.05      | 0.05       | 0.74      | 0.96      | 0.06  |
|        | <i>Db</i>  | 1.00         | 6.94      | 4.39      | 0.69      | 4.11      | 4.11      | 4.39      | 3.90       | 4.11      | 3.86      | 10.61 |
|        | <i>Cs</i>  | 2.00         | 0.20      | 0.10      | 0.24      | 10.45     | 0.10      | 0.10      | 0.10       | 0.10      | 0.32      | 0.19  |
|        | <i>Ct</i>  | 0.22         | 0.04      | 0.02      | 0.05      | 0.02      | 52.27     | 0.02      | 0.02       | 0.02      | 0.07      | 0.04  |
|        | <i>Sc</i>  | 0.66         | 0.17      | 0.09      | 0.21      | 0.09      | 0.09      | 12.48     | 0.09       | 0.09      | 0.34      | 0.10  |
|        | <i>Ke</i>  | 0.20         | 0.00      | 0.00      | 0.00      | 0.00      | 0.00      | 0.00      | 2644090.39 | 0.00      | 0.00      | 0.00  |
|        | <i>Ob</i>  | 0.16         | 1.99      | 0.48      | 0.04      | 0.01      | 0.01      | 0.01      | 0.01       | 70.07     | 0.05      | 0.02  |
|        | <i>Gc</i>  | 1.20         | 0.87      | 2.30      | 1.79      | 2.64      | 2.88      | 3.58      | 3.75       | 2.64      | 2.57      | 4.71  |
|        | <i>Ha</i>  | 1.40         | 2.37      | 1.62      | 2.97      | 4.50      | 4.42      | 1.63      | 1.74       | 1.74      | 9.68      | 1.18  |

60 **Legends.** *La* - *Loxodonta africana*, *Eq* - *Equus quagga*, *Db* - *Diceros bicornis*, *Cs* - *Ceratotherium simum*, *Ct* - *Connochaetes taurinus*, *Sc* - *Syncerus caffer*, *Ke* - *Kobus*  
61 *ellipsiprymnus*, *Ob* - *Oryx beisa*, *Gc* - *Giraffa camelopardalis*, *Ha* - *Hippopotamus amphibius*.

62

63

64

65

66

67

68

69

70 **Table 5. (continuation).**

| Taxa      | weight (t) | IC/SC     |           |           |          |          |           |           |           |           |
|-----------|------------|-----------|-----------|-----------|----------|----------|-----------|-----------|-----------|-----------|
|           |            | <i>El</i> | <i>Cc</i> | <i>Hp</i> | <i>G</i> | <i>P</i> | <i>Tp</i> | <i>Np</i> | <i>Pm</i> | <i>En</i> |
| <i>El</i> | 3.42       | 0.93      | 1.45      | 1.40      | 1.57     | 1.42     | 1.45      | 1.54      | 1.49      | 1.54      |
| <i>Cc</i> | 0.78       | 0.9       | 4.17      | 0.29      | 0.29     | 0.31     | 0.29      | 0.29      | 0.30      | 0.29      |
| <i>Hp</i> | 0.12       | 0.14      | 0.15      | 9.73      | 0.16     | 0.14     | 0.15      | 0.16      | 0.15      | 0.16      |
| <i>G</i>  | 0.71       | 0.06      | 0.06      | 0.06      | 17.64    | 0.07     | 0.06      | 0.06      | 0.06      | 0.06      |
| <i>P</i>  | 0.78       | 0.71      | 0.77      | 0.71      | 0.88     | 2.08     | 0.76      | 0.85      | 0.77      | 0.93      |
| <i>Tp</i> | 1.77       | 0.94      | 0.92      | 0.94      | 0.94     | 0.99     | 1.45      | 0.93      | 0.94      | 0.97      |
| <i>Np</i> | 6.30       | 0.64      | 0.60      | 0.64      | 0.59     | 0.68     | 0.60      | 1.82      | 0.64      | 0.59      |
| <i>Pm</i> | 0.28       | 0.62      | 0.63      | 0.62      | 0.68     | 0.65     | 0.60      | 0.66      | 3.12      | 0.89      |
| <i>En</i> | 0.42       | 0.07      | 0.06      | 0.07      | 0.06     | 0.08     | 0.07      | 0.06      | 0.08      | 16.78     |

71 **Legends.** *El* - *Eremotherium laurillardi*, *Cc* - *Catonyx cuvieri*, *Hp* - *Holmesina paulacoutoi*, *G* - *Glyptotherium* sp., *P* - *Panochthus* sp., *Tp* - *Toxodon platensis*, *Np* - *Notiomastodon*  
72 *platensis*, *Pm* - *Palaeolama major*, *En* - *Equus (Amerhippus) neogeus*.

73

74

75

76

77

78

79

80

81

82

83 **Table 6.** Biomass, expenditure energy (EE), secondary production and annual precipitation in localities from Africa in comparison to our meso-  
 84 megamammal assembly from Africa and Pleistocene of Sergipe, Brazil. **References:** <sup>(1)</sup> Coe *et al.* (1976); <sup>(2)</sup> Our data.

| Locality                                              | Biomass (Kg/km <sup>2</sup> ) | EE (Kj/Km <sup>2</sup> .h) | Sec. Production (Kg/Km <sup>2</sup> .yr) | AP (mm) |
|-------------------------------------------------------|-------------------------------|----------------------------|------------------------------------------|---------|
| Amboseli, Kenya <sup>(1)</sup>                        | 4,848                         | 22,970                     | 934                                      | 350     |
| Nairobi National Park, Kenya <sup>(1)</sup>           | 4,824                         | 24,728                     | 1,008                                    | 844     |
| Loliond Controld Area, Tanzania <sup>(1)</sup>        | 5,423                         | 26,962                     | 1,134                                    | 784     |
| Serengeti National Park, Tanzania <sup>(1)</sup>      | 8,352                         | 43,063                     | 1,743                                    | 803     |
| Ruaha National Park, Tanzania <sup>(1)</sup>          | 3,909                         | 12,474                     | 364                                      | 625     |
| Meso-megamammals from Africa <sup>(2)</sup>           | 4,485                         | 29,666                     | 1,278                                    | 565-845 |
| Meso-megamammals from, Sergipe, Brazil <sup>(2)</sup> | 4,842                         | 37,410                     | 1,250                                    | 585-832 |

85

1 **Supplementary Table 1.** Carbon (in VPDB) and oxygen (in VSMOW) isotopic values and available datings for ten extinct late Pleistocene vertebrate  
 2 taxa from Sergipe, Brazil.

| Species                | Sample number              | $\delta^{13}\text{C}$ (‰) | $B_A$ | $\delta^{18}\text{O}$ (‰) | Lat (° S) | Localities                  | Age (yr)                 |
|------------------------|----------------------------|---------------------------|-------|---------------------------|-----------|-----------------------------|--------------------------|
| <i>E. laurillardii</i> | LPUFS 5699 <sup>(1)</sup>  | -4.06 <sup>(d)</sup>      | 0.20  | 28.07 <sup>(d)</sup>      | 09°46'    | Faz. Charco, Poço Redondo   | -                        |
|                        | LPUFS 5700 <sup>(1)</sup>  | -5.82 <sup>(d)</sup>      | 0.30  | 27.42 <sup>(d)</sup>      | 09°46'    | Faz. Charco, Poço Redondo   | -                        |
|                        | LPUFS 5703 <sup>(1)</sup>  | -5.06 <sup>(d)</sup>      | 0.26  | 23.48 <sup>(d)</sup>      | 09°46'    | Faz. Charco, Poço Redondo   | -                        |
|                        | LPUFS 5701 <sup>(1)</sup>  | -3.97 <sup>(d)</sup>      | 0.19  | 28.57 <sup>(d)</sup>      | 09°46'    | Faz. Charco, Poço Redondo   | -                        |
|                        | LPUFS 5693 <sup>(1)</sup>  | -3.97 <sup>(d)</sup>      | 0.32  | 28.57 <sup>(d)</sup>      | 09°55'    | Faz. São José, Poço Redondo | -                        |
|                        | UGAMS 09431 <sup>(2)</sup> | -7.16 <sup>(d)</sup>      | 0.33  | 27.61 <sup>(d)</sup>      | 09°55'    | Faz. São José, Poço Redondo | 10,140±40 <sup>(1)</sup> |
|                        | UGAMS 09432 <sup>(2)</sup> | -5.31 <sup>(d)</sup>      | 0.28  | 29.03 <sup>(d)</sup>      | 09°55'    | Faz. São José, Poço Redondo | 22,440±50 <sup>(1)</sup> |
|                        | UGAMS 09433 <sup>(2)</sup> | -2.06 <sup>(d)</sup>      | 0.06  | 30.32 <sup>(d)</sup>      | 09°55'    | Faz. São José, Poço Redondo | 11,540±40 <sup>(1)</sup> |
|                        | UGAMS 13539 <sup>(2)</sup> | -7.70 <sup>(d)</sup>      | 0.32  | 29.70 <sup>(d)</sup>      | 09°55'    | Faz. São José, Poço Redondo | 10,990±30 <sup>(1)</sup> |
|                        | UGAMS 13540 <sup>(2)</sup> | -3.30 <sup>(d)</sup>      | 0.14  | 28.90 <sup>(d)</sup>      | 09°55'    | Faz. São José, Poço Redondo | 11,010±30 <sup>(1)</sup> |
|                        | UGAMS 13541 <sup>(2)</sup> | -6.00 <sup>(d)</sup>      | 0.31  | 29.70 <sup>(d)</sup>      | 09°55'    | Faz. São José, Poço Redondo | 9,720±30 <sup>(1)</sup>  |
|                        | UGAMS 13542 <sup>(2)</sup> | -3.30 <sup>(d)</sup>      | 0.14  | 27.70 <sup>(d)</sup>      | 09°55'    | Faz. São José, Poço Redondo | 9,730±30 <sup>(1)</sup>  |
|                        | UGAMS 13543 <sup>(2)</sup> | -4.70 <sup>(d)</sup>      | 0.24  | 29.70 <sup>(d)</sup>      | 09°55'    | Faz. São José, Poço Redondo | 11,580±30 <sup>(1)</sup> |
|                        | UGAMS 14017 <sup>(2)</sup> | -9.20 <sup>(d)</sup>      | 0.26  | 27.70 <sup>(d)</sup>      | 09°55'    | Faz. São José, Poço Redondo | 10,740±30 <sup>(1)</sup> |
| <i>C. cuvieri</i>      | UGAMS 09434 <sup>(2)</sup> | -2.94 <sup>(d)</sup>      | 0.12  | 28.94 <sup>(d)</sup>      | 10°00'    | Faz. Elefante, Gararu       | 11,540±40 <sup>(1)</sup> |
| <i>P. brasiliense</i>  | LPUFS 4799 <sup>(1)</sup>  | -6.66 <sup>(o)</sup>      | 0.25  | 28.70 <sup>(o)</sup>      | 09°46'    | Faz. Charco, Poço Redondo   | -                        |

3 **Legends.** <sup>(b)</sup> bone; <sup>(o)</sup> osteoderm; <sup>(d)</sup> dentine; <sup>(e)</sup> enamel. <sup>(1)</sup> <sup>14</sup>C AMS dating; <sup>(11)</sup> Electron Spin Resonance datings. <sup>(1)</sup> our data; <sup>(2)</sup> Dantas *et al.* (2017);  
 4 <sup>(3)</sup> Dantas *et al.* (2011).



5 **Supplementary Table 1 (continuation).**

| Species                  | Sample number              | $\delta^{13}\text{C}$ (‰) | $B_A$ | $\delta^{18}\text{O}$ (‰) | Lat (° S) | Localities                  | Age (yr)                     |
|--------------------------|----------------------------|---------------------------|-------|---------------------------|-----------|-----------------------------|------------------------------|
| <i>H. paulacoutoi</i>    | LPUFS 4924 <sup>(1)</sup>  | -6.05 <sup>(o)</sup>      | 0.27  | 30.36 <sup>(o)</sup>      | 09°55'    | Faz. São José, Poço Redondo | -                            |
| <i>Glyptotherium</i> sp. | LPUFS 5005 <sup>(1)</sup>  | -1.89 <sup>(o)</sup>      | 0.04  | 26.47 <sup>(o)</sup>      | 09°55'    | Faz. São José, Poço Redondo | -                            |
| <i>Panochthus</i> sp.    | LPUFS 4922 <sup>(1)</sup>  | -5.91 <sup>(o)</sup>      | 0.31  | 29.79 <sup>(o)</sup>      | 09°55'    | Faz. São José, Poço Redondo | -                            |
| <i>T. platensis</i>      | UGAMS 09446 <sup>(2)</sup> | -2.85 <sup>(e)</sup>      | 0.11  | 31.99 <sup>(e)</sup>      | 09°55'    | Faz. São José, Poço Redondo | 10,050±30 <sup>(I)</sup>     |
|                          | UGAMS 35325 <sup>(2)</sup> | -3.39 <sup>(e)</sup>      | 0.14  | 27.46 <sup>(e)</sup>      | 09°55'    | Faz. São José, Poço Redondo | -                            |
|                          | UGAMS 35321 <sup>(2)</sup> | -3.42 <sup>(e)</sup>      | 0.16  | 32.29 <sup>(e)</sup>      | 09°46'    | Faz. Charco, Poço Redondo   | -                            |
|                          | UGAMS 35322 <sup>(2)</sup> | -3.41 <sup>(e)</sup>      | 0.14  | 34.20 <sup>(e)</sup>      | 09°46'    | Faz. Charco, Poço Redondo   | -                            |
|                          | UGAMS 35323 <sup>(2)</sup> | -9.85 <sup>(e)</sup>      | 0.65  | 30.16 <sup>(e)</sup>      | 09°46'    | Faz. Charco, Poço Redondo   | -                            |
|                          | Amostra 5 <sup>(3)</sup>   | -                         | -     | -                         | 09°55'    | Faz. São José, Poço Redondo | 50,000 <sup>(II)</sup>       |
|                          | Amostra 3 <sup>(3)</sup>   | -                         | -     | -                         | 10°00'    | Faz. Elefante, Gararu       | 50,000 <sup>(II)</sup>       |
| <i>N. platensis</i>      | UGAMS 09437 <sup>(2)</sup> | 0.89 <sup>(e)</sup>       | 0.00  | 31.51 <sup>(e)</sup>      | 09°55'    | Faz. São José, Poço Redondo | 13,950±40 <sup>(I)</sup>     |
|                          | UGAMS 13535 <sup>(2)</sup> | -0.40 <sup>(e)</sup>      | 0.03  | 34.70 <sup>(e)</sup>      | 09°55'    | Faz. São José, Poço Redondo | 13,380±35 <sup>(I)</sup>     |
|                          | UGAMS 13536 <sup>(2)</sup> | -0.20 <sup>(e)</sup>      | 0.10  | 33.40 <sup>(e)</sup>      | 09°55'    | Faz. São José, Poço Redondo | 16,370±40 <sup>(I)</sup>     |
|                          | UGAMS 13537 <sup>(2)</sup> | -1.10 <sup>(e)</sup>      | 0.14  | 33.10 <sup>(e)</sup>      | 09°55'    | Faz. São José, Poço Redondo | 10,440±30 <sup>(I)</sup>     |
|                          | UGAMS 13538 <sup>(2)</sup> | 1.30 <sup>(e)</sup>       | 0.09  | 33.50 <sup>(e)</sup>      | 09°55'    | Faz. São José, Poço Redondo | 13,760±35 <sup>(I)</sup>     |
|                          | Unnumbered <sup>(2)</sup>  | -                         | -     | -                         | 09°55'    | Faz. São José, Poço Redondo | 28,000±3,000 <sup>(II)</sup> |
|                          | Amostra 10 <sup>(3)</sup>  | -                         | -     | -                         | 09°55'    | Faz. São José, Poço Redondo | 42,000 <sup>(II)</sup>       |
|                          | Amostra 2 <sup>(3)</sup>   | -                         | -     | -                         | 10°00'    | Faz. Elefante, Gararu       | 50,000 <sup>(II)</sup>       |

6 **Legends.** <sup>(b)</sup> bone; <sup>(o)</sup> osteoderm; <sup>(d)</sup> dentine; <sup>(e)</sup> enamel. <sup>(I)</sup> <sup>14</sup>C AMS dating; <sup>(II)</sup> Electron Spin Resonance datings. <sup>(1)</sup>our data; <sup>(2)</sup>Dantas *et al.* (2017);  
7 <sup>(3)</sup>Dantas *et al.* (2011).

8 **Supplementary Table 1 (continuation).**

| Species                | Sample number              | $\delta^{13}\text{C}$ (‰) | $B_A$ | $\delta^{18}\text{O}$ (‰) | Lat (° S) | Localities                  | Age (yr)                 |
|------------------------|----------------------------|---------------------------|-------|---------------------------|-----------|-----------------------------|--------------------------|
| <i>N. platensis</i>    | UGAMS 09439 <sup>(3)</sup> | -1.54 <sup>(e)</sup>      | 0.08  | 29.19 <sup>(e)</sup>      | 10°00'    | Sítios Novos, Canhoba       | 17,910±50 <sup>(1)</sup> |
| <i>P. major</i>        | LPUFS 1866 <sup>(1)</sup>  | -7.34 <sup>(b)</sup>      | 0.44  | 31.94 <sup>(b)</sup>      | 09°46'    | Faz. Charco, Poço Redondo   | -                        |
|                        | Amostra 6 <sup>(3)</sup>   | -                         | -     | -                         | 09°46'    | Faz. Charco, Poço Redondo   | 38,000 <sup>(II)</sup>   |
| <i>E. (A.) neogeus</i> | UGAMS 35326 <sup>(1)</sup> | -3.02 <sup>(e)</sup>      | 0.06  | 31.39 <sup>(e)</sup>      | 09°55'    | Faz. São José, Poço Redondo | -                        |
| <i>S. populator</i>    | LPUFS 5645 <sup>(1)</sup>  | -6.06 <sup>(b)</sup>      | 0.53  | 30.58 <sup>(b)</sup>      | 09°46'    | Faz. Charco, Poço Redondo   | -                        |
| <i>C. latirostris</i>  | UGAMS 13544 <sup>(4)</sup> | -3.01 <sup>(e)</sup>      | 0.27  | 31.40 <sup>(e)</sup>      | 09°55'    | Faz. São José, Poço Redondo | 9,680±30 <sup>(1)</sup>  |

9 **Legends.** <sup>(b)</sup> bone; <sup>(o)</sup> osteoderm; <sup>(d)</sup> dentine; <sup>(e)</sup> enamel. <sup>(I)</sup> <sup>14</sup>C AMS dating; <sup>(II)</sup> Electron Spin Resonance datings. <sup>(1)</sup>our data; <sup>(2)</sup>Dantas *et al.* (2017);  
10 <sup>(3)</sup>Dantas *et al.* (2011); <sup>(4)</sup>França *et al.* (2014).

11  
12  
13  
14  
15  
16  
17  
18  
19  
20  
21  
22

23 **Supplementary Table 2.** Weight estimation for several taxa of Pleistocenic megafauna from Brazilian Intertropical Region.

| Taxa                  | humerus       |        | femur        |        | Weight (Kg) | Localities                      |
|-----------------------|---------------|--------|--------------|--------|-------------|---------------------------------|
|                       | Sample        | Circ.  | Sample       | Circ.  |             |                                 |
| <i>E. laurillardi</i> | LPUFS 2101    | 350.00 |              |        |             | Monte Alegre/SE <sup>(1)</sup>  |
|                       |               |        | LPUFS        | 740.00 |             | Monte Alegre/SE <sup>(1)</sup>  |
|                       |               |        | LPUFS 2264   | 658.00 |             | Poço Redondo/SE <sup>(1)</sup>  |
| mean                  |               | 350.00 |              | 699.00 | 3,416.18    |                                 |
| <i>C. cuvieri</i>     | MCL 22470/02  | 211.00 |              |        |             | Nova Redenção/BA <sup>(1)</sup> |
|                       | MCL 22473     | 240.00 |              |        |             | Nova Redenção/BA <sup>(1)</sup> |
|                       | MCL 22475     | 216.00 |              |        |             | Nova Redenção/BA <sup>(1)</sup> |
|                       |               |        | MCL 22500    | 325.00 |             | Nova Redenção/BA <sup>(1)</sup> |
|                       |               |        | MCL 22394/08 | 394.00 |             | Nova Redenção/BA <sup>(1)</sup> |
| mean                  |               | 222.33 |              | 359.50 | 777.73      |                                 |
| <i>P. brasiliense</i> | MCC 996-V     | 59.66  |              |        |             | Baraúna/RN <sup>(2)</sup>       |
|                       |               |        | MCC 1133-V   | 153.86 |             | Baraúna/RN <sup>(2)</sup>       |
|                       | mean          | 59.66  |              | 153.86 | 38.03       |                                 |
| <i>Panochthus</i> sp. | UESB 318PV172 | 136.00 |              |        |             | Anagé/BA <sup>(1)</sup>         |
|                       | MN 2964-V     | 120.26 |              |        |             | Taperoá/PB <sup>(3)</sup>       |
|                       |               |        | MN 2760-2V   | 239.08 |             | Taperoá/PB <sup>(3)</sup>       |
| mean                  |               | 128.13 |              | 239.08 | 783.99      |                                 |

24 **References.** <sup>(1)</sup> our data; <sup>(2)</sup> Porpino et al (2009); <sup>(3)</sup> Porpino & Bergqvist (2002).

25

26 **Supplementary Table 2 (continuation).**

| Taxa                     | humerus      |        | femur        |        | Weight (Kg) | Localities                         |
|--------------------------|--------------|--------|--------------|--------|-------------|------------------------------------|
|                          | Sample       | Circ.  | Sample       | Circ.  |             |                                    |
| <i>Glyptotherium</i> sp. | MCC 1087V    | 102.05 |              |        |             | Baraúna/RN <sup>(2)</sup>          |
|                          |              |        | MCC 1560V    | 252.30 |             | Baraúna/RN <sup>(2)</sup>          |
| mean                     |              | 102.05 |              | 252.30 | 711.28      |                                    |
| <i>H. paulacoutoi</i>    | MCL 501/02   | 123.00 |              |        |             | Jacobina/BA <sup>(1)</sup>         |
|                          |              |        | MCL 501/08   | 155.00 |             | Jacobina/BA <sup>(1)</sup>         |
| mean                     |              | 123.00 |              | 155.00 | 120.64      |                                    |
| <i>N. platensis</i>      | MHNT-VT 2035 | 523.16 |              |        |             | São Bento do Una/PE <sup>(4)</sup> |
|                          | MHNT-VT 2036 | 386.95 |              |        |             | São Bento do Una/PE <sup>(4)</sup> |
|                          | MHNT-VT 2037 | 338.78 |              |        |             | São Bento do Una/PE <sup>(4)</sup> |
|                          |              |        | MHNT-VT 1138 | 510.44 |             | São Bento do Una/PE <sup>(4)</sup> |
|                          |              |        | MHNT-VT 2031 | 325.08 |             | São Bento do Una/PE <sup>(4)</sup> |
|                          |              |        | MHNT-VT 2032 | 274.40 |             | São Bento do Una/PE <sup>(4)</sup> |
| mean                     |              | 416.30 |              | 369.97 | 6,266.18    |                                    |
| <i>T. platensis</i>      | LPUFS 2188   | 265.00 |              |        |             | Poço Redondo/SE <sup>(1)</sup>     |
|                          |              |        | LPUFS 5691   | 230.00 |             | Poço Redondo/SE <sup>(1)</sup>     |
| mean                     |              | 265.00 |              | 230.00 | 1,771.60    |                                    |

27 **References.** <sup>(1)</sup> our data; <sup>(2)</sup> Porpino et al (2009); <sup>(4)</sup> Molena (2012).

28

29

30 **Supplementary Table 2 (continuation).**

| Taxa                   | humerus       |        | femur         |        | Weight (Kg) | Localities                          |
|------------------------|---------------|--------|---------------|--------|-------------|-------------------------------------|
|                        | Sample        | Circ.  | Sample        | Circ.  |             |                                     |
| <i>P. major</i>        | UESB 318PV172 | 136.00 |               |        |             | Anagé/BA <sup>(1)</sup>             |
|                        |               |        | UESB 318PV173 | 117.00 |             | Anagé/BA <sup>(1)</sup>             |
| Mean                   |               | 136.00 |               | 117.00 | 283.54      |                                     |
| <i>E. (A.) neogeus</i> | MCL 6212      | 140.00 |               |        |             | Ourolândia/BA <sup>(1)</sup>        |
|                        |               |        | MCL 6229      | 152.00 |             | Ourolândia/BA <sup>(1)</sup>        |
| mean                   |               | 140.00 |               | 152.00 | 419.36      |                                     |
| <i>S. populator</i>    | MCL 7187/48   | 137.00 |               |        |             | Campo Formoso/BA <sup>(1)</sup>     |
|                        | MCL 2998      | 151.00 |               |        |             | Ourolândia/BA <sup>(1)</sup>        |
|                        |               |        | MCL 7160      | 124.00 |             | Jacobina/BA <sup>(1)</sup>          |
|                        |               |        | MCL 7161      | 114.00 |             | Jacobina/BA <sup>(1)</sup>          |
| mean                   |               | 144.00 |               | 119.00 | 315.19      |                                     |
| <i>M. tridactyla</i>   | MCL 1602/06   | 72.00  |               |        |             | Morro do Chapéu/BA <sup>(1)</sup>   |
|                        | MCN-M 99      | 100.00 |               |        |             | Morro do Chapéu/BA <sup>(1)</sup>   |
|                        |               |        | MCL 1602/07   | 83.00  |             | Belo Horizonte (Zoo) <sup>(1)</sup> |
|                        |               |        | MCN-M 99      | 74.00  |             | Belo Horizonte (Zoo) <sup>(1)</sup> |
| mean                   |               | 86.00  |               | 78.50  | 34.86       |                                     |

31 **References.** <sup>(1)</sup> our data.

32

33

34 **Supplementary Table 2 (continuation).**

|                        |          |       |          |       |                                     |
|------------------------|----------|-------|----------|-------|-------------------------------------|
| <i>P. maximus</i>      | MACN s/n | 98.91 |          |       | locality unavailable <sup>(5)</sup> |
|                        |          |       | MACN s/n | 70.02 | locality unavailable <sup>(5)</sup> |
| mean                   |          | 98.91 |          | 70.02 | 43.12                               |
| <i>T. tetradactyla</i> | LEG 0644 | 39.00 |          |       | Campo Formoso/BA <sup>(1)</sup>     |
|                        | LEG s/n  | 44.00 |          |       | Ituaçu/BA <sup>(1)</sup>            |
|                        |          |       | LEG 0656 | 31.00 | Campo Formoso/BA <sup>(1)</sup>     |
|                        |          |       | LEG s/n  | 39.00 | Ituaçu/BA <sup>(1)</sup>            |
| mean                   |          | 41.50 |          | 35.00 | 4.57                                |

35 **References.** <sup>(1)</sup> our data; <sup>(5)</sup> Fariña & Vizcaino (1997).

36

37 **Supplementary Table 3.** Estimated carbon ( $\delta^{13}\text{C}$ ) diet-bioapatite enrichment ( $\epsilon^*_{\text{diet-bioapatite}}$ ) in  
 38 herbivores from Africa and Sergipe.

| <b>Taxa</b>                         | <b>Weight (Kg)</b> | <b><math>\epsilon^*_{\text{diet-bioapatite}}</math> (‰)</b> | <b><math>\epsilon^*_{\text{diet-bioapatite}}</math> (‰)<br/>used</b> |
|-------------------------------------|--------------------|-------------------------------------------------------------|----------------------------------------------------------------------|
| <i>Pachyarmatherium brasiliense</i> | 38.03              | 12.47                                                       | 12.00                                                                |
| <i>Holmesina paulacoutoi</i>        | 124.64             | 12.99                                                       |                                                                      |
| <i>Oryx beisa</i>                   | 160.00             | 13.10                                                       |                                                                      |
| <i>Kobus ellipsiprymnus</i>         | 200.00             | 13.20                                                       |                                                                      |
| <i>Connochaetes taurinus</i>        | 220.00             | 13.24                                                       | 13.00                                                                |
| <i>Palaeolama major</i>             | 285.00             | 13.36                                                       |                                                                      |
| <i>Equus quagga</i>                 | 290.00             | 13.37                                                       |                                                                      |
| <i>Equus (Amerhippus) neogeus</i>   | 420.00             | 13.54                                                       |                                                                      |
| <i>Catonyx cuvieri</i>              | 777.73             | 13.82                                                       |                                                                      |
| <i>Syncerus caffer</i>              | 660.00             | 13.75                                                       |                                                                      |
| <i>Glyptotherium</i> sp.            | 710.00             | 13.78                                                       |                                                                      |
| <i>Panochthus</i> sp.               | 785.00             | 13.83                                                       |                                                                      |
| <i>Diceros bicornis</i>             | 1,000.00           | 13.94                                                       | 14.00                                                                |
| <i>Giraffa camelopardalis</i>       | 1,200.00           | 14.03                                                       |                                                                      |
| <i>Hippopotamus amphibius</i>       | 1,400.00           | 14.10                                                       |                                                                      |
| <i>Toxodon platensis</i>            | 1,770.00           | 14.21                                                       |                                                                      |
| <i>Ceratotherium simum</i>          | 2,000.00           | 14.27                                                       |                                                                      |
| <i>Eremotherium laurillardii</i>    | 3,416.18           | 14.54                                                       |                                                                      |
| <i>Loxodonta africana</i>           | 5,000.00           | 14.73                                                       | 15.00                                                                |
| <i>Notiomastodon platensis</i>      | 6,300.00           | 14.84                                                       |                                                                      |

39
